1 **Title:**

2 Ecdysteroid kinase-like (EcKL) paralogs confer developmental tolerance to caffeine  
3 in *Drosophila melanogaster*

4

5

6 **Authors:**

7 Jack L. Scanlan<sup>1</sup>, Paul Battlay<sup>1</sup>, Charles Robin<sup>1</sup>

8

9 <sup>1</sup> School of BioSciences, The University of Melbourne, Parkville Campus, Melbourne,  
10 Victoria, 3010, Australia

11

12

13 **Corresponding author:**

14 Charles Robin

15 [crobin@unimelb.edu.au](mailto:crobin@unimelb.edu.au)

16 Building 184, School of BioSciences, The University of Melbourne, Parkville  
17 Campus, Melbourne, Victoria, 3010, Australia.

18

19

20

21 **Highlights:**

- 22 • Phosphorylation is an under-characterised detoxification reaction in insects
- 23 • Dro5 EcKL genes are good detoxification candidate genes in *Drosophila*
- 24 *melanogaster*
- 25 • Knockout and misexpression of some Dro5 genes modulated tolerance to
- 26 caffeine
- 27 • Dro5 genes may also confer tolerance to the fungal toxin kojic acid
- 28 • Caffeine tolerance could be adaptive for *Drosophila* associating with *Citrus*
- 29 fruits

30

31 **Abstract:**

32

33 A unique aspect of metabolic detoxification in insects compared to other animals is  
34 the presence of xenobiotic phosphorylation, about which little is currently  
35 understood. Our previous work raised the hypothesis that members of the  
36 taxonomically restricted ecdysteroid kinase-like (EckKL) gene family encode the  
37 enzymes responsible for xenobiotic phosphorylation in the model insect *Drosophila*  
38 *melanogaster* (Diptera: Ephydroidea)—however, candidate detoxification genes  
39 identified in the EckKL family have yet to be functionally validated. Here, we test the  
40 hypothesis that EckKL genes in the rapidly evolving Dro5 clade are involved in the  
41 detoxification of plant and fungal toxins in *D. melanogaster*. The mining and  
42 reanalysis of existing data indicated multiple Dro5 genes are transcriptionally  
43 induced by the plant alkaloid caffeine and that adult caffeine susceptibility is  
44 associated with a novel naturally occurring indel in *CG31370* (Dro5-8) in the  
45 *Drosophila* Genetic Reference Panel (DGRP). CRISPR-Cas9 mutagenesis of five  
46 Dro5 EckKLs substantially decreased developmental tolerance of caffeine, while  
47 individual overexpression of two of these genes—*CG31300* (Dro5-1) and *CG13659*  
48 (Dro5-7)—in detoxification-related tissues increased developmental tolerance. In  
49 addition, we found Dro5 loss-of-function animals also have decreased  
50 developmental tolerance of the fungal secondary metabolite kojic acid. Taken  
51 together, this work provides the first compelling functional evidence that EckKLs  
52 encode detoxification enzymes and suggests that EckKLs in the Dro5 clade are  
53 involved in the metabolism of multiple ecologically relevant toxins in *D.*  
54 *melanogaster*. We also propose a biochemical hypothesis for EckKL involvement in  
55 caffeine detoxification and highlight the many unknown aspects of caffeine  
56 metabolism in *D. melanogaster* and other insects.

57

58

59

60

61

62 **Keywords:**

63 Ecdysone; DUF227; Ecdysteroid kinase-like; Toxicology; *Citrus*; Induction

64

65

66 **Abbreviations:**

67 ABC: ATP-binding cassette

68 CNS: Central nervous system

69 DGRP: Drosophila Genetic Reference Panel

70 GWAS: Genome-wide association study

71 EcKL: Ecdysteroid kinase-like

72 UDP: Uridine diphosphate

73

74

## 75 **1. Introduction**

76

77 Metabolic detoxification (also called ‘xenobiotic metabolism’; herein called  
78 ‘detoxification’) is the process by which toxic compounds from the environment—  
79 often the diet—are chemically modified by an organism such that their toxicity is  
80 reduced and/or they can be rapidly excreted from the body (Omiecinski et al., 2011;  
81 Williams, 1951). Detoxification is a key aspect of the chemical ecology of insects,  
82 where it often defines a species’ niche through an attenuation of the fitness effects of  
83 toxins present in food sources (Ibanez et al., 2012) or produced by competitors  
84 (LeBrun et al., 2014; Trienens et al., 2017). In addition, resistance to synthetic  
85 insecticides often evolves through novel or enhanced detoxification abilities (Joußen  
86 et al., 2012; Schmidt et al., 2017; Zhu et al., 2010), making understanding the  
87 biochemistry, physiology and genetics of detoxification in insects crucial for the  
88 sustainable control of agricultural pests and vectors of human disease.

89

90 Conventionally, detoxification as a biochemical process has been conceptually  
91 divided into two or three ‘phases’, each of which involves the action of enzymes or  
92 transporter proteins (Omiecinski et al., 2011; Williams, 1959, 1951). Phase I—  
93 modification—is the addition of functional groups, or cleavage revealing functional  
94 groups, that facilitates the addition of further moieties; modification reactions are  
95 frequently catalysed by members of the cytochrome P450 and  
96 carboxylcholinesterase families (Bernhardt, 2006; Oakeshott et al., 2005). Phase II—  
97 conjugation—is the addition of bulky, typically hydrophilic moieties that decreases  
98 toxicity and facilitates excretion; conjugation reactions are frequently catalysed by  
99 members of the glutathione S-transferase and UDP-glycosyltransferase families  
100 (Bock, 2016; Enayati et al., 2005). Phase III—excretion—involves the efflux of toxins  
101 and their metabolites out of target cells and tissues, typically mediated by ABC  
102 transporters (Wu et al., 2019). Detoxification is thought to mainly occur in three  
103 tissues in the insect body—the midgut, the Malpighian tubules and the fat body (Li et  
104 al., 2019; Yang et al., 2007)—partially due to the substantial enrichment of  
105 detoxification gene expression and xenobiotic metabolism at these sites.

106

107 Despite this knowledge, many aspects of the biochemistry and physiology of  
108 detoxification in insects remains under-explored. Notably, many insect taxa can  
109 phosphorylate xenobiotic molecules, particularly steroidal, phenolic and glycosidic  
110 compounds (reviewed in Scanlan et al., 2020), raising the possibility that  
111 phosphorylation is a unique Phase II detoxication reaction in insects, at least with  
112 respect to other animals (Mitchell, 2015). However, due to a distinct lack of focus on  
113 these reactions in the published literature, the toxicological importance of xenobiotic  
114 phosphorylation is unclear.

115

116 The ecdysteroid kinase-like (EcKL) gene family encodes a group of predicted small-  
117 molecule kinases predominantly present in insect and crustacean genomes (Mitchell  
118 et al., 2014) that have had limited functional characterisation, with known links  
119 between individual genes and ecdysteroid hormone metabolism in the silkworm moth  
120 *Bombyx mori* (Lepidoptera: Bombycoidea; Sonobe et al., 2006) and *Wolbachia*-  
121 mediated cytoplasmic incompatibility (Liu et al., 2014) in the vinegar fly *Drosophila*  
122 *melanogaster* (Diptera: Ephydroidea). Recently, we proposed that the EcKL family  
123 encodes the kinases responsible for xenobiotic phosphorylation in insects,  
124 supporting this hypothesis by analysing genomic and transcriptomic data in the  
125 genus *Drosophila* (Scanlan et al., 2020). We found that EcKL genes evolve in a rapid  
126 birth-death pattern characteristic of other detoxification gene families, are enriched  
127 for expression in detoxification-related tissues, and are transcriptionally induced by  
128 feeding on xenobiotic compounds; overall, 47% of EcKL genes in *D. melanogaster*  
129 have a high 'detoxification score', a novel predictive metric validated against the  
130 known functions of members of the cytochrome P450 gene family (Scanlan et al.,  
131 2020). These data motivated the following experiments to functionally validate the  
132 involvement of the EcKL gene family in detoxification processes.

133

134 EcKLs in the *Drosophila* genus can be grouped into 46 clades, each derived from a  
135 single gene in the most recent common ancestor of the 12 *Drosophila* species we  
136 previously examined (Scanlan et al., 2020). These clades (and subclades) give each  
137 *Drosophila* EcKL a 'DroX-Y' designation (where X is the clade number and Y is the  
138 subclade number) for easier comparisons between species, although this is not  
139 intended to be used as an official gene name (Scanlan et al., 2020; Jack L. Scanlan,  
140 PhD thesis, The University of Melbourne, 2020). One ancestral EcKL clade in

141 *Drosophila*—Dro5—has experienced the largest number of gene duplications (20) in  
142 the genus and could be further divided into at least 12 subclades (Fig. 1B). *D.*  
143 *melanogaster* possesses seven genes in the Dro5 clade—CG31300 (Dro5-1),  
144 CG31104 (Dro5-2), CG13658 (Dro5-5), CG11893 (Dro5-6), CG13659 (Dro5-7),  
145 CG31370 (Dro5-8) and CG31436 (Dro5-10)—the first five of which are predicted to  
146 be involved in detoxification processes based on their detoxification score (Scanlan  
147 et al., 2020). These Dro5 paralogs are grouped into two clusters of four and three  
148 genes within a larger 26-gene cluster of EcKLs on chromosome 3R (Fig. 1A) and  
149 differ in their enrichment within the main detoxification tissues (Fig. 1C), as well as in  
150 their induction by the ingestion of xenobiotic compounds or toxic fungal competitors  
151 (reviewed in Scanlan et al., 2020). We noticed that three Dro5 genes in *D.*  
152 *melanogaster* are consistently transcriptionally induced in 3<sup>rd</sup>-instar larvae after  
153 feeding on the insecticidal plant alkaloid caffeine in two independent datasets (Fig.  
154 1D), raising the possibility that some of these genes may be involved in caffeine  
155 metabolism.

156

157 In this study, we provide the first compelling functional evidence that members of the  
158 EcKL gene family encode xenobiotic kinases, by testing the hypothesis that Dro5  
159 EcKLs in *D. melanogaster* are involved in the detoxification of plant and fungal  
160 secondary metabolites. Using gene disruption and transgenic overexpression  
161 techniques, we show that multiple Dro5 genes confer developmental tolerance to  
162 caffeine, and also find an association between a naturally occurring deletion allele  
163 and adult susceptibility to caffeine in an inbred panel of genotypes (the DGRP).  
164 Additionally, we find that Dro5 genes may confer tolerance to the fungal metabolite  
165 kojic acid. These results support the hypothesis that EcKLs encode xenobiotic  
166 kinases and suggest that the biochemistry of caffeine metabolism in *D. melanogaster*  
167 should be revisited in greater detail.

168

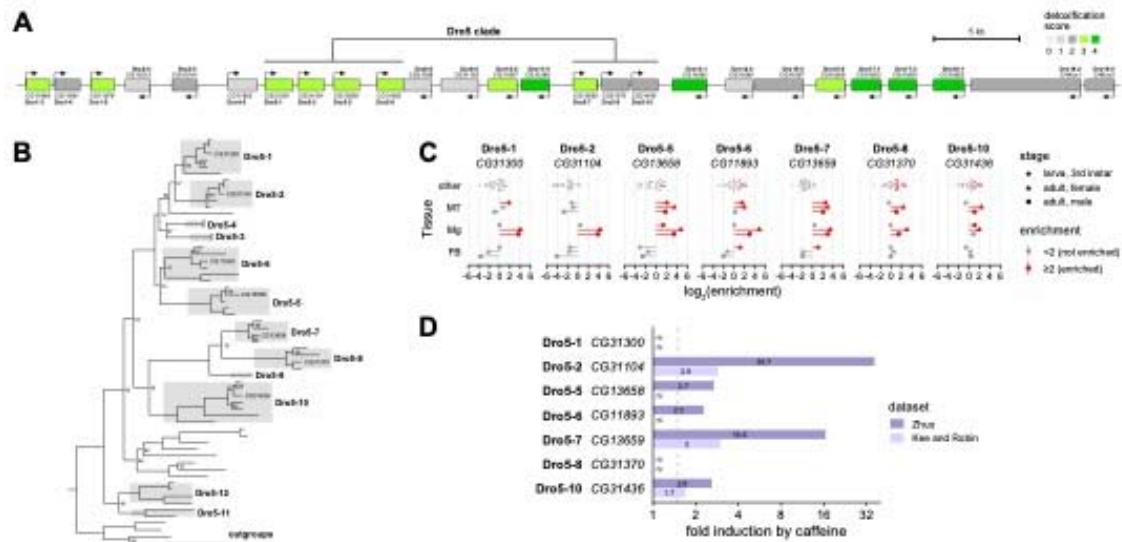

169

170 **Figure 1.** Genomic location, evolution and expression of the Dro5 clade in *Drosophila melanogaster*.  
 171 (A) The large EckL gene cluster on chromosome 3R, with the seven Dro5 clade genes indicated.  
 172 Genes are coloured by their ‘detoxification score’, where a value of 3 or 4 suggests the gene encodes  
 173 a detoxification enzyme (Scanlan et al., 2020). (B) Phylogenetic tree of 57 Dro5 EckLs (and four  
 174 outgroup EckLs) from 12 *Drosophila* species, grouped into sub-clades (Scanlan et al., 2020).  
 175 Numbers at nodes are bootstrap support values from UFBoot2 (Hoang et al., 2018); nodes without  
 176 numbers have support values of 100. Only Dro5 genes from *D. melanogaster* have been named for  
 177 ease of interpretation, but tips are coloured by the species of origin. (C) Tissue expression enrichment  
 178 (for detail, see Scanlan et al., 2020) of *D. melanogaster* Dro5 genes in detoxification tissues (MT,  
 179 Malpighian tubules; Mg, midgut; FB, fat body) and all other tissues (other) at three life stages, based  
 180 on data in FlyAtlas 2 (Leader et al., 2018). For a given tissue, enrichment values greater than or equal  
 181 to 2 (red) indicate a gene is nominally ‘enrichment’, while enrichment values less than 2 (grey)  
 182 indicate a gene is ‘not enriched’, compared to whole-body expression. (D) Transcriptional induction of  
 183 Dro5 genes in *D. melanogaster* 3<sup>rd</sup>-instar larvae after feeding on caffeine-supplemented media  
 184 compared to control media, in the Zhuo dataset (Ran Zhuo, PhD thesis, University of Alberta, 2014;  
 185 dark purple) and the Robin & Kee (2021) dataset (light purple). The fold induction cutoff (1.5x) is  
 186 indicated with a dashed line; the fold induction is indicated on each bar. Note the log<sub>2</sub> scale on the x-  
 187 axis. ni, not induced.

## 188 **2. Material and methods**

189

### 190 **2.1. Fly genotypes and husbandry**

191

#### 192 **2.1.1. Fly husbandry**

193 For routine stock maintenance, flies were kept on yeast-cornmeal-molasses media  
194 ('standard media'; <http://bdsc.indiana.edu/information/recipes/molassesfood.html>) at  
195 18 °C, 21 °C or 25 °C in plastic vials sealed with cotton stoppers. All bioassays were  
196 conducted at 25 °C. Bioassays that were analysed together (each represented by a  
197 different figure or sub-figure in the results) were conducted as a group on the same  
198 batch of media at the same time to minimise intra-experiment batch effects.

199

#### 200 **2.1.2. Fly genotypes**

201 The following fly lines were obtained from the Bloomington Drosophila Stock Center  
202 (BDSC): *CG31300*<sup>MB00063</sup> (BL22688), *CG13658*<sup>MIO3110</sup> (BL37335), *CG11893*<sup>MB00360</sup>  
203 (BL22775), *CG31370*<sup>MIO7438</sup> (BL44188), *CG31436*<sup>MIO1111</sup> (BL33107), *w*<sup>1118</sup>,  
204 *Df(3R)BSC852/TM6C*, *Sb*<sup>1</sup>, *cu*<sup>1</sup> (BL27923), *w*<sup>\*</sup>; *Sb*<sup>1</sup>/TM3, *actGFP*, *Ser*<sup>1</sup> (BL4534),  
205 *hsFLP*, *y*<sup>1</sup>, *w*<sup>1118</sup>; *nos-GAL4*, UAS-Cas9 (BL54593), and *y*<sup>1</sup>, *v*<sup>1</sup>, *P{y<sup>+</sup>7.7=**nos-*  
206 *phiC31int.NLS}X*; *P{y<sup>+</sup>7.7=CaryP}attP40*; (BL25709). DGRP lines were also obtained  
207 from the BDSC. The *w*<sup>1118</sup>; *Kr<sup>JF-1</sup>/CyO*; *Sb*<sup>1</sup>/TM6B, *Antp<sup>Hu</sup>*, *Tb*<sup>1</sup> double-balancer line  
208 (also known as *w*<sup>1118</sup>-DB), *6g1HR-6c-GAL4* (also known as HR-GAL4; Chung et al.,  
209 2007) and *tub-GAL4/TM3*, *actGFP*, *Ser*<sup>1</sup> were a kind gift of Philip Batterham (The  
210 University of Melbourne) and Trent Perry (The University of Melbourne).  
211 *Df(3R)BSC852/TM3*, *actGFP*, *Ser*<sup>1</sup> was made by crossing BL7923 to BL4534 and  
212 selecting the appropriate genotype. *w*<sup>1118</sup>; *Kr<sup>JF-1</sup>/CyO*; *nos-GAL4*, UAS-Cas9 was  
213 made by routine crosses, starting with BL54593 males and *w*<sup>1118</sup>-DB females, until  
214 the desired genotype was achieved. *w*<sup>1118</sup>; 25709; *Sb*<sup>1</sup>/TM6B, *Antp<sup>Hu</sup>*, *Tb*<sup>1</sup>  
215 (chromosome 2 isogenic to BL25709) was made by routine crosses, starting with  
216 BL25709 males and *w*<sup>1118</sup>-DB females, until the desired genotype was achieved.  
217 *w*<sup>1118</sup>; 25709; *Sb*<sup>1</sup>/TM3, *actGFP*, *Ser*<sup>1</sup> was made by routine crosses, starting with  
218 BL25709 males and *w*<sup>1118</sup>; *Kr<sup>JF-1</sup>/CyO*; *Sb*<sup>1</sup>/TM3, *actGFP*, *Ser*<sup>1</sup> females (which  
219 themselves were made by routine crosses beginning with BL4534 males and *w*<sup>1118</sup>-  
220 DB females), until the desired genotype was achieved.



221

222

## 223 **2.2. Plasmid cloning and *D. melanogaster* transgenesis**

224

### 225 **2.2.1. pCFD6 cloning**

226 20 nt gRNAs were designed with CRISPR Optimal Target Finder (Gratz et al., 2014;  
227 <http://targetfinder.flycrispr.neuro.brown.edu/>) with the stringency set to 'maximum'.

228 The pCFD6 vector (Addgene plasmid #73915; <http://n2t.net/addgene:73915>;  
229 RRID:Addgene\_73915) was a gift from Simon Bullock. The recombinant pCFD6  
230 plasmids 'pCFD6-Dro5A' and 'pCFD6-Dro5B', each of which express—under the  
231 control of a UAS promoter—four gRNAs that target either the Dro5A or Dro5B locus  
232 (Fig. 2A), were designed *in silico* using Benchling (<http://benchling.com>), and cloned  
233 as described by Port & Bullock (2016), with minor modifications below. pCFD6 was  
234 digested with *BbsI*-HF (NEB) and the 9.4 kb backbone gel-purified. The intact  
235 pCFD6 vector was used as a template for the production of the three overlapping  
236 gRNA-containing inserts by PCR with Phusion Flash polymerase (NEB) using pairs  
237 of primers (pCFD6-Dro5A: pCFD6\_D5ΔA\_1F/R, pCFD6\_D5ΔA\_2F/R and  
238 pCFD6\_D5ΔA\_3F/R; pCFD6-Dro5B: pCFD6\_D5ΔB\_1F/R, pCFD6\_D5ΔB\_2F/R and  
239 pCFD6\_D5ΔB\_3F/R). Gel-purified inserts were cloned into the digested pCFD6  
240 backbone using Gibson assembly (E5520S, NEB) with a 3:1 molar ratio of each  
241 insert to vector and 0.3 pmol of total DNA per reaction, with a 4 hr incubation time. 2  
242 μL of each 20 μL assembly reaction was used to transform DH5-α *E. coli* (C2987H,  
243 NEB), resultant colonies of which were screened for successful assembly with  
244 colony PCR —2 min initial denaturation (95 °C), then 2 min denaturation (95 °C), 45  
245 sec annealing (58 °C) and 1 min extension (72 °C) for 32 cycles, then a 5 min final  
246 extension (72 °C)—using GoTaq Green Master Mix (M7123, Promega) and the  
247 pCFD6\_seqfwd and pCFD6\_seqrev primers (Table S1) with an expected amplicon  
248 size of 890 bp for both plasmids. Plasmids from positive colonies were Sanger  
249 sequenced using the pCFD6\_seqfwd and pCFD6\_seqrev primers at the Australian  
250 Genome Research Facility (AGRF).

251

### 252 **2.2.2. pUASTattB cloning**

253 Full-length cDNA clones for *CG31300* (FI01822), *CG31104* (IP12282), *CG13658*  
254 (FI12013), *CG11893* (IP11926), *CG13659* (IP11858), *CG31370* (IP10876) and  
255 *CG31436* (IP12392) were obtained from the Drosophila Genomics Resource Center  
256 (DGRC). Recombinant pUASTattB plasmids (Bischof et al., 2007) containing  
257 individual EcKL ORFs under the control of a UAS promoter were designed *in silico*  
258 using Benchling (<http://benchling.com>). The pUASTattB vector was digested with  
259 *EagI*-HF (NEB) and *KpnI*-HF (NEB) and the 8.5 kb backbone gel-purified (28704,  
260 Qiagen). ORFs were amplified with PCR—10 sec initial denaturation (98 °C), then 5  
261 sec denaturation (98 °C), 5 sec annealing (55 °C) and 15 sec extension (72 °C) for  
262 32 cycles, then a final 1 min extension (72 °C)—using Phusion Flash polymerase  
263 (NEB) from cDNA clones using primers containing an *EagI* restriction site (forward  
264 primers) or a *KpnI* restriction site (reverse primers), as well as an additional 5'  
265 sequence (5'-TAAGCA-3') to aid digestion (Table S1). Amplicons were column-  
266 purified (FAPCK 001, Favorgen), double-digested with *EagI*-HF and *KpnI*-HF for 8  
267 hr, then gel-purified. *EagI/KpnI*-digested ORFs were ligated into the *EagI/KpnI*-  
268 digested pUASTattB vector backbone using a 6:1 insert:vector molar ratio and T4  
269 DNA ligase (M0202S, NEB) in a thermocycler overnight (~16 hr), alternating  
270 between 10 °C for 30 sec and 30 °C for 30 sec (Lund et al., 1996). 5 µL of each 20  
271 µL ligation reaction was used to transform DH5- $\alpha$  *E. coli*, resultant colonies of which  
272 were screened for successful assembly with colony PCR—2 min initial denaturation  
273 (95 °C), then 2 min denaturation (95 °C), 45 sec annealing (58 °C) and 1.5 min  
274 extension (72 °C) for 32 cycles, then a 5 min final extension (72 °C)—using GoTaq  
275 Green Master Mix and the pUASTattB\_3F/5R primers (Table S1). Plasmids from  
276 positive colonies were Sanger sequenced using the pUASTattB\_3F and  
277 pUASTattB\_5R primers at AGRF.

278

### 279 **2.2.3. *D. melanogaster* transgenesis**

280 Correctly assembled plasmids were sent to TheBestGene Inc. (US) for microinjection  
281 and incorporation into the *D. melanogaster* genome at the attP40 site on  
282 chromosome 2 (BL25709). Transformed lines were received as a mixture of white-  
283 eyed (zero copies of the mini-*white* gene), orange-eyed (one copy of the mini-*white*  
284 gene) and red-eyed (two copies of the mini-*white* gene) flies—virgin white-eyed flies  
285 were pooled and retained as a genetic background line ('yw'), while the plasmid-  
286 integrated lines were individually kept as the red-eyed homozygous stocks

287 'pCFD6Dro5A' and 'pCFD6Dro5B' (of genotype  $w^+$ , 25709; *pCFD6*; 25709), and  
288 UAS-CG31300, UAS-CG31104, UAS-CG13658, UAS-CG11893, UAS-CG13659,  
289 UAS-CG31370 and UAS-CG31436 (of genotype  $w^+$ , 25709; *pUASTattB*; 25709).

290

### 291 **2.3. CRISPR-Cas9 mutagenesis**

292

293 Transgenic CRISPR-Cas9 mutagenesis of wild-type chromosomes was performed  
294 with the crossing scheme in Figure S1A. Single founder male flies—heterozygous for  
295 possibly mutagenised loci on chromosome 3—were allowed to mate with  $w^{1118}$ ;  
296 25709; *Sb<sup>1</sup>/TM3, actGFP, Ser<sup>1</sup>* virgin females, and when larvae were observed in the  
297 food media, the DNA from each founder male was extracted as per Bischof *et al.*  
298 (2014) and genotyped by PCR as below. Mutagenesis of already-mutagenised  
299 chromosomes was performed with the crossing scheme in Figure S1B, using  
300 homozygous mutant lines generated previously. Single founder male flies—which  
301 were heterozygous for possibly (singly- or doubly-) mutagenised loci on chromosome  
302 3—were allowed to mate with  $w^{1118}$ ; 25709; *Sb<sup>1</sup>/TM3, actGFP, Ser<sup>1</sup>* virgin females,  
303 and when larvae were observed in the food media, the DNA from each founder male  
304 was extracted using the squish prep protocol, then PCR genotyped with four GoTaq  
305 Green reactions per line, which were combined before gel-purification to allow for the  
306 detection of early-cycle polymerase- derived errors by close inspection of the  
307 sequencing chromatogram output. Dro5A genotyping used the primer pairs  
308 D5ΔA\_1F/1R and D5ΔA\_2F/2R, and Dro5B genotyping used the D5ΔB\_1F/1R and  
309 D5ΔB\_2F/2R primer pairs. PCR—2 min initial denaturation (95 °C), then 2 min  
310 denaturation (95 °C), 45 sec annealing (55 °C) and 1.5 min extension (72 °C) for 32  
311 cycles, then a 5 min final extension (72 °C)—was carried out with GoTaq Green  
312 Master Mix. Gel-purified amplicons were sequenced using the appropriate  
313 genotyping primers at AGRF.

314

315 Wild-type flies with the genetic background of flies bearing Dro5 mutations ( $w^{1118}$ ;  
316 25709; 25709—otherwise known as '+') were generated by following the crossing  
317 scheme in Figure S1A, but using BL25709 as the maternal genotype in C1 instead of  
318 a *pCFD6*-containing line.

319

## 320 **2.4. Standard media developmental viability assays**

321

### 322 **2.4.1. Egg-to-adult developmental viability assays**

323 Egg-to-adult viability was estimated from the adult genotypic ratios of successfully  
324 eclosing offspring produced from crosses between a homozygous parental genotype  
325 and a heterozygous parental genotype, the latter of which had at least one  
326 phenotypic marker that revealed the genotype of the offspring. Males and females of  
327 the relevant genotypes were allowed to mate and lay eggs on vials of standard  
328 media, with at least five vials per cross, and the number of adults of each genotype  
329 were scored after development at 25 °C for 14 days. If the adult genotypic ratio was  
330 significantly different from the 1:1 Mendelian expectation, as determined by the  
331 'binom.test' function in R, this was considered evidence that one genotype was less  
332 viable than the other.

333

### 334 **2.4.2. Larval-to-adult developmental viability assays**

335 Larval-to-adult viability was estimated by transferring particular quantities of 1st-  
336 instar larvae of known genotypes (either as the offspring of a cross between  
337 homozygous parents, or offspring sorted phenotypically by the presence or absence  
338 of a dominant marker such as GFP expression) to vial of standard media, letting  
339 them develop at 25 °C for 14 days, and scoring the number of individuals that  
340 reached the stages of pupariation, pupation, pharate adult and eclosion. Fisher's  
341 exact test ('fisher.test' function in R) was used to determine if there were significant  
342 differences between genotypes.

343

## 344 **2.5. DGRP analyses**

345

### 346 **2.5.1. DGRP *in silico* and PCR genotyping**

347 BAM files containing alignments of DGRP line sequences from Illumina platforms to  
348 the *y; cn bw sp*; reference genome were recovered from the Baylor College of  
349 Medicine website (<https://www.hgsc.bcm.edu/content/dgrp-lines>; Mackay et al.,  
350 2012). Local alignments were visualized with IGV (Thorvaldsdóttir et al., 2013) to  
351 manually score structural variation *in silico*. For PCR genotyping, the primers  
352 CG31370del\_1F and CG31370del\_1R (Table S1) were designed to flank the

353 *CG31370<sup>del</sup>* region and produce a 576 bp amplicon from *CG31370<sup>wt</sup>* and a 392 bp  
354 amplicon from *CG31370<sup>del</sup>*. DNA was extracted from single flies as per Bischof *et al.*  
355 (2014) with three independent extractions per DGRP line. PCR—2 min initial  
356 denaturation (95 °C), then 30 sec denaturation (95 °C), 30 sec annealing (53 °C) and  
357 40 sec extension (72 °C) for 30 cycles, then a 5 min final extension (72 °C)—was  
358 carried out with GoTaq Green Master Mix, using 0.4 µL of DNA extract as a template  
359 per 10 µL reaction. Amplicons were visualised with gel electrophoresis using 1.5%  
360 agarose gels.

361

## 362 **2.5.2. DGRP caffeine tolerance data and analyses**

363 Adult caffeine survival data was obtained from Najarro *et al.* (2015). Developmental  
364 caffeine (388 µg/mL) survival data from Montgomery *et al.* (2014) was averaged  
365 across the three replicates, and then corrected for (similarly averaged) control (0  
366 µg/mL caffeine) survival using Abbott's formula (Abbott, 1925), with corrected  
367 survival values greater than 1 (indicating greater survival than control) adjusted to 1.  
368 Basal gene expression levels in adult female and adult male flies from different  
369 DRGP lines were obtained from Everett *et al.* (2020). Mean differences in  
370 phenotypes and gene expression between *CG31370* genotypes were determined  
371 with the *dabestr* package (version 0.2.5; Ho *et al.*, 2019) in R; effect sizes with 95%  
372 confidence intervals that did not include zero were considered significant.

373

374

## 375 **2.6. Single-dose developmental toxicological assays**

376

### 377 **2.6.1. Media**

378 Quercetin, escin, esculin and curcumin were purchased from Sigma-Aldrich. Toxin-  
379 containing media and control media were prepared by adding 100 µL of quercetin,  
380 escin, esculin or curcumin dissolved in 100% EtOH or 100 µL of EtOH, respectively,  
381 to 5mL of molten yeast-sucrose media (5% w/v inactive yeast, 5% w/v sucrose, 1%  
382 w/v agar, 0.38% v/v propionic acid, 0.039% v/v orthophosphoric acid, 0.174% w/v  
383 Tegosept, 1.65% v/v EtOH) in each vial and mixing with a clean plastic rod. Media  
384 was stored at 4 °C for a maximum of three days before use.

385

## 386 **2.6.2. Assays**

387 *Dro5<sup>A3-B7</sup>* females were mated to *Dro5<sup>A3-B7</sup>* or wild-type (+; the genetic background of  
388 the CRISPR-Cas9 mutagenesis lines) males and were allowed to lay on apple juice  
389 plates (2% w/v agar, 3.125% w/v sucrose, 25% v/v apple juice) topped with yeast  
390 paste. After hatching, 20 1st-instar larvae were transferred to each vial of media  
391 using a fine paintbrush that was washed between each transfer, and left to develop  
392 at 25 °C for 14 days. Vials were scored for the number of individuals that had  
393 pupated (formation of the puparium) and that had successfully eclosed (complete  
394 vacation of the puparium). Mortality counts were determined as 'larval' (# of larvae –  
395 # of pupae) or 'pre-adult' (# of larvae – # of adults eclosed), and proportional  
396 mortality was calculated by dividing mortality counts by the number of larvae added  
397 to each vial. Mean differences in proportional mortality between the two genotypes  
398 on each type of media were analysed with Welch's two-sided t-test with unequal  
399 variance ('t.test' function in R).

400

## 401 **2.7. Multiple-dose developmental toxicological assays**

402

### 403 **2.7.1. Media**

404 Caffeine, kojic acid and salicin were purchased from Sigma-Aldrich. Toxin-containing  
405 media was prepared by adding toxin stock solution—compound dissolved in dH<sub>2</sub>O—  
406 to molten 1.25x yeast-sucrose media (Section 2.6.1): X µL of 40–50 mg/mL toxin  
407 stock solution, 1000–X µL of dH<sub>2</sub>O (where X varied according to the final  
408 concentration of toxin) and 4 mL of 1.25x media were added to each vial, for a total  
409 media volume of 5 mL, then mixed with a clean plastic rod. Control media was made  
410 by mixing 4 mL of molten 1.25x media and 1 mL of dH<sub>2</sub>O. Media was stored at 4 °C  
411 for a maximum of three days.

412

### 413 **2.7.2. Assays**

414 Males and females of the relevant genotypes were crossed, and females were  
415 allowed to lay on apple juice plates (Section 2.6.2) topped with yeast paste. 20–30  
416 1st-instar larvae were transferred to each toxin-containing food vial using a fine  
417 paintbrush that was washed between each transfer, and left to develop at 25 °C for  
418 14 days. Crosses involving GFP-marked balancer chromosomes had larvae sorted

419 against GFP under a bright-field fluorescent microscope before transferal. Vials were  
420 scored for the number of individuals that had pupated (formation of the puparium)  
421 and that had successfully eclosed (complete vacation of the puparium). Three types  
422 of survival counts (toxicological endpoints) were calculated: 'larval-to-pupal' (L-P; #  
423 of larvae – # of pupae), 'pupal-to-adult' (P-A; # of pupae – # of adults eclosed) or  
424 'larval-to-adult' (L-A; # of larvae – # of adults eclosed). Survival counts were  
425 converted to proportional survival by dividing by the number of larvae per vial, except  
426 in the case of pupal mortality counts, which were converted by dividing by the  
427 number of pupae; vials with zero pupae were excluded from PA models to avoid  
428 undefined values. Proportional survival data were analysed with the *drc* package  
429 (version 3.0-6; Ritz et al., 2015). 3-parameter log-logistic regression models (with a  
430 fixed lower limit of 0) were fit with proportional survival as the response and toxin  
431 concentration in  $\mu\text{g/mL}$  as the dose; all models were assessed with the 'noEffect'  
432 function to check for a significant dose-response effect.  $\text{LC}_{50}$  values and their 95%  
433 confidence intervals (95% CIs) were calculated relative to the model's estimated  
434 upper limit (ie. the background mortality of each genotype), using robust standard  
435 errors from the *sandwich* package (version 2.5-1; Zeileis, 2006, 2004). Statistical  
436 comparison of  $\text{LC}_{50}$  values was performed with the 'EDcomp' function in *drc*, with the  
437 95% CI of the ratio of the  $\text{LC}_{50}$ s excluding 1 being considered statistically significant.

438

## 439 **2.8. Citrus media developmental viability assays**

440

### 441 **2.8.1. Media**

442 'Delite' mandarin oranges (*Citrus reticulata*), 'Ruby Blush' grapefruits (*C. x paradisi*)  
443 and navel sweet oranges (*C. x sinensis*) were juiced with a hand juicer, juice was  
444 strained to remove large pulp particles, and yeast, agar and  $\text{dH}_2\text{O}$  were added and  
445 heated in a microwave. After cooling to  $60\text{ }^\circ\text{C}$ , 10% Tegosept in EtOH was added,  
446 and 5 mL of media was aliquoted into each vial. Final concentrations of yeast and  
447 agar were 5% and 1% w/v, respectively, and 0.174% and 1.65% v/v for Tegosept  
448 and EtOH, respectively (5 g yeast, 1 g agar, 20 mL  $\text{dH}_2\text{O}$  and 80 mL juice for 100 mL  
449 of media).

450

### 451 **2.8.2. Assays**

452 Thirty 1st-instar larvae were transferred to each fruit media vial using a fine  
453 paintbrush and left to develop at 25 °C for 14 days. Vials were each scored for the  
454 number of larvae that had pupated (formation of the puparium) and that had  
455 successfully eclosed (complete vacation of the puparium) and proportional survival  
456 was calculated by dividing by the number of larvae added to each vial. Mean  
457 differences in proportional mortality between the two genotypes on each type of  
458 media was analysed with Welch's two-sided t-test with unequal variance ('t.test'  
459 function in R).

460

## 461 **2.9. Data handling and presentation**

462

463 Data cleaning and restructuring was performed in R (version 3.6.1; Team, 2019)  
464 using the *tidyverse* collection of packages (version 1.2.1; Wickham et al., 2019).  
465 Genomic loci were visualised with GenePalette ([www.genepalette.org](http://www.genepalette.org); Smith et al.,  
466 2017). Data were visualised with either the *ggplot2* package (version 3.2.1;  
467 Wickham, 2016) or the *dabestr* package (version 0.2.5; Ho et al., 2019) in R, and  
468 resulting plots were polished in Adobe Illustrator.



## 469 **3. Results**

470

### 471 **3.1. CRISPR-Cas9 mutagenesis of the *Dro5* EcKL clade**

472

473 We attempted to generate a *D. melanogaster* line that had all seven *Dro5* genes  
474 specifically deleted or disrupted, using CRISPR-Cas9 mutagenesis—a ‘*Dros5*-null’  
475 allele. As the *Dro5* genes lie in two clusters—*Dro5A* (containing four genes) and  
476 *Dro5B* (containing three genes; Fig. 2A)—separated by four non-*Dro5* EcKLs, we  
477 used an approach in which a multi-gRNA-expressing pCFD6 construct (Port and  
478 Bullock, 2016) targets one cluster of genes, then the resulting deletion alleles is used  
479 as the genetic background for another round of mutagenesis with a separate pCFD6  
480 construct (Fig. S1). Mutagenesis at the *Dro5A* cluster produced eight large deletion  
481 alleles (putatively generated by cuts between distant gRNA target sites) detected  
482 through PCR from screening 24 founder males, including the *Dro5*<sup>A3</sup> allele, which  
483 contained a 7,690 bp deletion (Fig. 2A). Forty founder males were screened for  
484 mutations at the *Dro5B* cluster using PCR, but no large deletions encompassing the  
485 entire *Dro5B* cluster were detected; given a lack of heteroduplex bands generated  
486 after PCR with the D5ΔB\_2F/D5ΔB\_2R primer pair, the 3<sup>rd</sup> and 4<sup>th</sup> gRNAs from the  
487 pCFD6-*Dro5B* construct failed to cut. However, we successfully isolated a  
488 frameshifting composite deletion allele of *CG13659* (*Dro5*-7) designated *CG13659*<sup>38</sup>  
489 (consisting of a 2 bp deletion 43 bp upstream of the transcription start site and a 241  
490 bp deletion in the first exon that deleted 81 aa; Fig. 2A). The *Dro5A* allele *Dro5*<sup>A3</sup>  
491 was selected for a second round of mutagenesis to produce additional deletions at  
492 the *Dro5B* cluster—16 founder males were screened, with two putative deletions  
493 detected at the *CG13659* locus, but none across the *Dro5B* cluster as a whole. Thus  
494 a fly line, *Dro5*<sup>A3-B7</sup>, was generated that was a homozygous-viable composite allele  
495 consisting of two deletions, one 7,690 bp long in *Dro5A* and one 153 bp long in  
496 *Dro5B*. This bore a complete deletion of *CG31300* (*Dro5*-1), *CG31104* (*Dro5*-2) and  
497 *CG13658* (*Dro5*-5), and partial deletions of 1,245 bp (415 aa) of the CDS of  
498 *CG11893* (*Dro5*-6) and the first 85 bp (28 aa) of *CG13659* (*Dro5*-7), including the  
499 transcription and translation start sites of both genes (Fig. 2A).

500

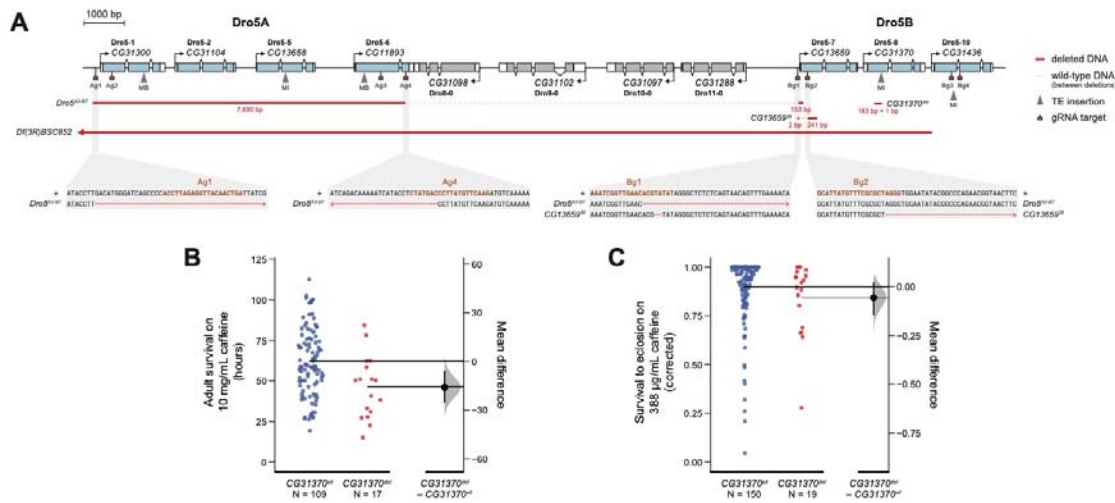

501

502 **Figure 2.** Alleles at the Dro5A and Dro5B loci in *D. melanogaster* and caffeine-related phenotypes of  
 503 *CG31370* genotypes in the DGRP. (A) The location of deletion and transposable element (TE)  
 504 insertion alleles in Dro5 genes (blue) at the Dro5A and Dro5B loci, either induced by CRISPR-Cas9  
 505 mutagenesis in this study (*Dro5*<sup>A3-B7</sup> and *CG13659*<sup>36b</sup>), previously derived from TE insertion (MI and  
 506 MB) or FRT-mediated deletion (*Df(3R)BSC852*), or naturally present in the DGRP (*CG31370*<sup>del</sup>). Top:  
 507 Gene models, with coding sequence in blue (Dro5 genes) or grey (other EcKLs) and non-coding  
 508 (UTR) sequence in white. Middle: Positions and sizes of molecular lesions. Bottom: Sequence-level  
 509 detail of deleted nucleotides in CRISPR-Cas9-derived alleles compared to the wild-type genetic  
 510 background (+), with the gDNA target sites highlighted in brown. (B,C) Estimation plots (Ho et al.,  
 511 2019) of mean phenotypic differences between homozygous *CG31370*<sup>wt</sup> (blue) and homozygous  
 512 *CG31370*<sup>del</sup> (red) DGRP lines. The right-hand axis shows the mean difference (effect size; black dot)  
 513 between groups, with the 95% CI (black line) and distribution of bootstrapped means (grey curve).  
 514 Effect sizes with CIs that do not include zero are considered significant. (B) Survival in hours of adult  
 515 female flies of different DGRP lines on 10 mg/mL caffeine-supplemented media (as phenotyped by  
 516 Najarro et al., 2015). (C) Corrected proportional survival to eclosion of larvae of different DGRP lines  
 517 developing in 388 µg/mL caffeine-supplemented media (as phenotyped by Montgomery et al., 2014).  
 518

519 **3.2. *Dro5* EcKLs are not required for normal development of *Drosophila***  
520 ***melanogaster***

521

522 To test if any *Dro5* genes are required for gross development in *D. melanogaster* on  
523 standard media, we placed loss-of-function alleles for all *Dro5* genes—either pre-  
524 existing transposable element coding sequence (CDS) insertions or those generated  
525 in Section 3.1—in *trans* to the homozygous-lethal chromosomal deficiency  
526 *Df(3R)BSC852*, which deletes or otherwise likely disrupts all seven *Dro5* genes (and  
527 11 other genes), and measured egg-to-adult viability. Loss of five individual *Dro5*  
528 genes, or five genes simultaneously in the case of the *Dro5*<sup>A3-B7</sup> allele, did not  
529 significantly affect adult genotypic ratios, suggesting *Dro5* genes are not required for  
530 normal development in the absence of toxic challenge (Fig. 3A). A larval-to-adult  
531 viability experiment involving just the *Dro5*<sup>A3-B7</sup> allele further supported this  
532 conclusion, with the vast majority of *Dro5*<sup>A3-B7</sup>/*Df(3R)BSC852* individuals  
533 successfully completing development, and no significant difference was found  
534 between the developmental outcomes of *Dro5*<sup>A3-B7</sup>/*Df(3R)BSC852* and *Dro5*<sup>A3-</sup>  
535 <sup>B7</sup>/TM3, *actGFP*, *Ser*<sup>1</sup> animals ( $p = 0.56$ , Fisher's exact test; Fig. 3B).

536

537 In addition, all seven *Dro5* genes were individually misexpressed from the  
538 pUASTattB vector with the strong, ubiquitous GAL4 driver *tub-GAL4* on standard  
539 media to test if misexpression could disrupt developmental progression.  
540 Misexpression of *CG31104* (*Dro5-2*) and *CG13658* (*Dro5-5*) resulted in no or very  
541 few successfully eclosing adults (Fig. 3C), suggesting ectopic or excessive  
542 expression of either gene arrests development. Examination of *tub>CG31104* and  
543 *tub>CG13658* animals, using brightfield fluorescence microscopy to select against  
544 GFP-positive individuals, revealed that these genotypes are arrested during  
545 metamorphosis, with pharate adults having completely undifferentiated abdomens,  
546 lacking bristles and genitalia. Misexpression of the other five *Dro5* genes did not  
547 significantly change adult genotypic ratios (Fig. 3C) and therefore does not appear to  
548 grossly affect developmental progression.

549

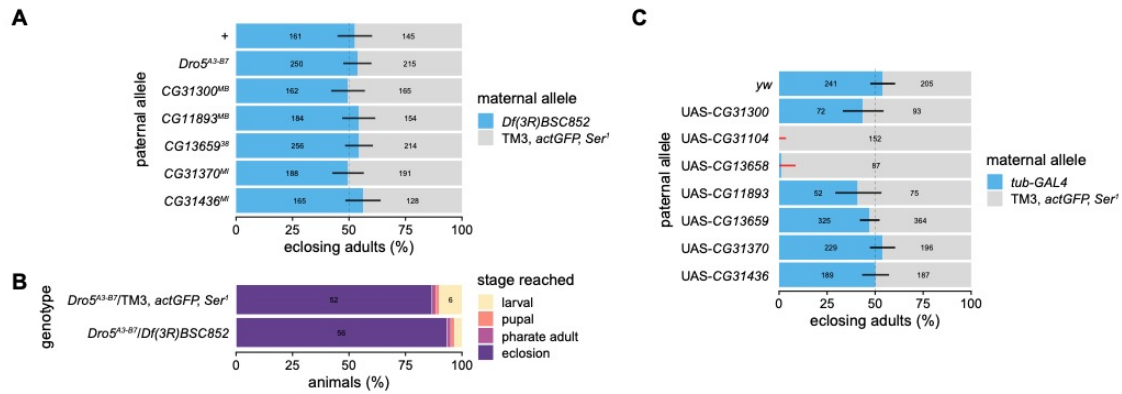

550

551 **Figure 3.** Developmental viability of *Dro5* mutants and *Dro5* ubiquitous overexpression animals on lab  
552 media. (A) Egg-to-adult viability of *Dro5* loss-of-function alleles (or the wild-type allele +) over the  
553 deficiency *Df(3R)BSC852* estimated from the adult genotypic ratios of offspring from crosses between  
554 *Df(3R)BSC852/TM3, actGFP, Ser<sup>1</sup>* females and males of one of seven homozygous null-allele  
555 genotypes. The dashed line indicates the expected 1:1 genotypic ratio if both genotypes per cross are  
556 equally developmentally viable; error bars are 95% confidence intervals (adjusted for seven tests) for  
557 the proportion of *Df(3R)BSC852* heterozygotes; black and red bars indicate non-significant or  
558 significant deviations, respectively, from expected genotypic ratios after correction for multiple tests.  
559 Numbers on the bars are the number of adults scored of that genotype. (B) Larvae-to-adult viability of  
560 offspring from the cross between *Df(3R)BSC852/TM3, actGFP, Ser<sup>1</sup>* females and homozygous  
561 *Dro5<sup>A3-B7</sup>* males, sorted at the 1st-instar larval stage by GFP fluorescence (n = 60 larvae per  
562 genotype). Numbers on the bars are the number of individuals in each lethal phase category (for  
563 numbers greater than five). (C) Egg-to-adult viability of the misexpression of *Dro5* ORFs (or non-  
564 misexpression from the genetic background *yw*) using the strong, ubiquitous GAL4 driver *tub-GAL4*,  
565 estimated from the adult genotypic ratios of offspring from crosses between *tub-GAL4/TM3, actGFP,*  
566 *Ser<sup>1</sup>* females and males of one of eight homozygous responder genotypes. The dashed line indicates  
567 the expected 1:1 genotypic ratio if both genotypes per cross are equally developmentally viable; error  
568 bars are 99.38% CIs (95% CI adjusted for eight tests) for the proportion of *tub-GAL4* heterozygotes;  
569 black and red bars indicate non-significant or significant deviations, respectively, from expected  
570 genotypic ratios after correction for multiple tests. Numbers on the bars are the number of adults  
571 scored of that genotype.

572

573 **3.3. A composite deletion in the *Dro5B* cluster further motivates an**  
574 **exploration of caffeine tolerance in *D. melanogaster***

575

576 A manual reanalysis of structural variation associated with *EckL* genes in the  
577 *Drosophila* Genetic Reference Panel (DGRP; Mackay et al., 2012) identified a novel  
578 composite deletion in the first exon of *CG31370* (*Dro5-8*) compared to the Release 6  
579 reference genome, of sizes 183 bp (3R:25,302,734..25,302,916) and 1 bp  
580 (3R:25,302,921), 5 bp apart. Given that this naturally occurring allele was composed  
581 of derived deletions (based on comparisons with *CG31370* orthologs in other  
582 *Drosophila* genomes; Scanlan et al., 2020), it was designated *CG31370<sup>del</sup>* (Fig. 2A),  
583 while the ancestral allele was designated *CG31370<sup>wt</sup>*. *CG31370<sup>del</sup>* is missing 61 aa  
584 of the encoded *CG31370* protein and also induces a frameshift, making it a likely  
585 strong loss-of-function allele. 202 DGRP lines were genotyped *in silico* at *CG31370*,  
586 with 182 lines homozygous for *CG31370<sup>wt</sup>*, 17 lines homozygous for *CG31370<sup>del</sup>* and  
587 two lines heterozygous for both alleles; five lines were unable to be called due to  
588 uninformative read mapping depth or a lack of available mapped-read data. We also  
589 genotyped the *CG31370* locus of 46 DGRP lines using PCR, revealing a single  
590 additional *CG31370<sup>wt</sup>* homozygote and four additional *CG31370<sup>del</sup>* homozygotes  
591 among the five uncalled lines, as well as validating the *in silico* genotypes of 31 and  
592 10 *CG31370<sup>wt</sup>* homozygotes and *CG31370<sup>del</sup>* homozygotes, respectively. (For the  
593 genotypes of all lines, see Table S1.)

594

595 We tested whether there was an association between this recharacterized naturally  
596 occurring *CG31370<sup>del</sup>* allele and the caffeine susceptibility data generated by Najarro  
597 *et al.* (2015). They measured the mean lifespan of adult female flies from 165 DGRP  
598 lines feeding on media containing 1% (10 mg/mL) caffeine but found no significant  
599 genome-wide associations in their analyses using SNPs; of 165 lines with a  
600 phenotype in their dataset, 126 had a confident *CG31370* genotype (109 lines  
601 homozygous for *CG31370<sup>wt</sup>*, 17 lines homozygous for *CG31370<sup>del</sup>*, and one  
602 heterozygous line). We added the *CG31370<sup>del</sup>* genotype to the DGRP variant data  
603 (<http://dgrp2.gnets.ncsu.edu/data.html>) and performed a GWAS with PLINK (Purcell  
604 *et al.*, 2007) using the five major inversion and *Wolbachia* infection status as  
605 covariates and the phenotypic data from Najarro *et al.* (Najarro *et al.*, 2015), and the

606 *CG31370<sup>del</sup>* allele ranked among the top 0.3% of annotated variants in the DGRP.  
607 An estimation statistics approach suggests the mean difference in the survival time  
608 on 10 mg/mL caffeine between homozygous *CG31370<sup>wt</sup>* and *CG31370<sup>del</sup>* lines was  
609 15.9 hours (95% CI: 5.93, 25.5; Fig. 2B), suggesting the *CG31370<sup>del</sup>* allele increases  
610 adult susceptibility to caffeine.

611

612 We also tested whether the *CG31370<sup>del</sup>* allele is negatively associated with a  
613 developmental caffeine survival phenotype, measured by Montgomery et al. (2014)  
614 as successful development (larval feeding through to adult eclosion) on media  
615 containing 388 µg/mL caffeine; of the 173 DGRP lines with a phenotype in their  
616 dataset, 169 had a confident *CG31370* genotype (150 homozygous for *CG31370<sup>wt</sup>*,  
617 19 homozygous for *CG31370<sup>del</sup>*, and two heterozygous lines). The mean difference  
618 in the corrected survival proportion on 388 µg/mL caffeine between homozygous  
619 *CG31370<sup>wt</sup>* and *CG31370<sup>del</sup>* lines was 0.054 (95% CI: -0.025, 0.15; Fig. 2C),  
620 suggesting these genotypes do not significantly differ in their susceptibility to caffeine  
621 at this dose. Given that most DGRP lines showed high corrected survival on 388  
622 µg/mL caffeine, it is likely that this dose—which was originally intended by  
623 Montgomery et al. (2014) to be sub-lethal and was 25.8-fold lower than that used by  
624 Najarro et al. (2015)—was insufficiently high to discriminate between the *CG31370<sup>wt</sup>*  
625 and *CG31370<sup>del</sup>* genotypes, if they do indeed vary in their developmental  
626 susceptibility to caffeine.

627

### 628 **3.4. *Dro5* loss-of-function mutants have increased developmental** 629 ***susceptibility to caffeine***

630

631 To further test the hypothesis that some *Dro5* genes function in caffeine  
632 detoxification, we conducted dose-response developmental toxicology assays on  
633 50–1,500 µg/mL caffeine media with wild-type and *Dro5<sup>A3-B7</sup>* homozygote animals,  
634 with three toxicological endpoints determined: larval-to-adult (L-A) survival, larval-to-  
635 pupal (L-P) survival, and pupal-to-adult (P-A) survival. The median lethal  
636 concentration (LC<sub>50</sub>) of caffeine was significantly lower for *Dro5<sup>A3-B7</sup>* homozygotes  
637 than for wild-type animals, with LC<sub>50</sub> ratios of 0.26 (95% CI: 0.247, 0.274), 0.656  
638 (95% CI: 0.565, 0.747) and 0.184 (95% CI: 0.158, 0.211) for L-A, L-P and P-A

639 survival, respectively (Fig. 4), indicating increased developmental susceptibility to  
640 caffeine in mutant animals, particularly during metamorphosis. A notable, qualitative  
641 effect of caffeine exposure on *Dro5*<sup>A3-B7</sup> mutant animals was high pharate adult  
642 lethality—where pharate adults attempted to eclose but remained trapped in the  
643 puparium before dying—even at relatively low concentrations (200–300 µg/mL)  
644 where survival from the larval stage to pupation was high.

645

646 We also performed dose-response developmental toxicology assays with wild-type  
647 and *Dro5*<sup>A3-B7</sup> chromosomes in *trans* with the *Df(3R)BSC852* deficiency, which  
648 should fully fail to complement the *Dro5*<sup>A3-B7</sup> allele, to confirm that the susceptibility  
649 to caffeine seen in *Dro5*<sup>A3-B7</sup> homozygotes was due to mutations at the *Dro5* locus  
650 and not a secondary site mutation on chromosome 3. There was no significant dose  
651 effect for *Df(3R)BSC852/+* animals at any of the three endpoints for the  
652 concentration range used, but there was a large reduction in L-A and P-A survival  
653 (and a small reduction in L-P survival) at the highest caffeine concentration (1000  
654 µg/mL) for *Df(3R)BSC852/Dro5*<sup>A3-B7</sup> animals (Fig. S2), suggesting that the  
655 *Df(3R)BSC852* deficiency fails to complement the *Dro5*<sup>A3-B7</sup> allele and that lesions at  
656 the *Dro5* locus are indeed responsible for the increased developmental susceptibility  
657 to caffeine seen in *Dro5*<sup>A3-B7</sup> homozygotes (Fig. 4).

658

659 As the *Dro5*<sup>A3-B7</sup> allele disrupts five *Dro5* EckL genes, we aimed to test whether  
660 single-gene loss-of-function alleles for these genes would individually fail to  
661 complement the *Dro5*<sup>A3-B7</sup> allele for developmental survival on caffeine, which would  
662 indicate that the disrupted gene contributes to the caffeine susceptibility phenotype.  
663 Using transposable element (TE) insertion alleles for three genes—*CG31300* (*Dro5*-  
664 1), *CG13658* (*Dro5*-5) and *CG11893* (*Dro5*-6)—and the previously described  
665 *CG13659*<sup>38</sup> deletion allele as a loss-of-function allele for *CG13659* (*Dro5*-7), we  
666 crossed these homozygous lines to either *Dro5*<sup>A3-B7</sup> homozygotes or wild-type  
667 homozygotes and scored the developmental survival of their progeny on caffeine  
668 media; due to unusually high mortality on control media, we excluded these data  
669 points from fitted models (Fig. S3A,C,E). All genotypes possessing a *Dro5*<sup>A3-B7</sup> allele  
670 had lower L-A survival LC<sub>50</sub>s, suggesting a failure of the single-gene disruption  
671 alleles to complement the larger deletion (Fig. 5A, Fig. S3A); as survival of the  
672 +/*CG31300*<sup>MB00063</sup> and +/*CG13658*<sup>MI03110</sup> genotypes did not significantly respond to

673 the change in caffeine concentration, their LC<sub>50</sub>s were higher than 1,000 µg/mL and  
674 therefore likely different from their corresponding *Dro5*<sup>A3-B7</sup> loss-of-function  
675 genotypes. P-A survival LC<sub>50</sub>s were lower for all disruption genotypes compared to  
676 their control genotypes (Fig. S3F), while L-P survival LC<sub>50</sub>s were only lower for  
677 *Dro5*<sup>A3-B7</sup>/*CG11893*<sup>MB</sup> and *Dro5*<sup>A3-B7</sup>/*CG13659*<sup>38</sup> animals compared to their control  
678 genotypes (Fig. S3D). These results suggest that loss of each of the four genes may  
679 contribute to the increased caffeine susceptibility of *Dro5*<sup>A3-B7</sup> homozygotes during  
680 the pupal stage, but only *CG11893* (Dro5-6) and *CG13659* (Dro5-7) likely contribute  
681 to the increased susceptibility during the larval stage (Table 1).



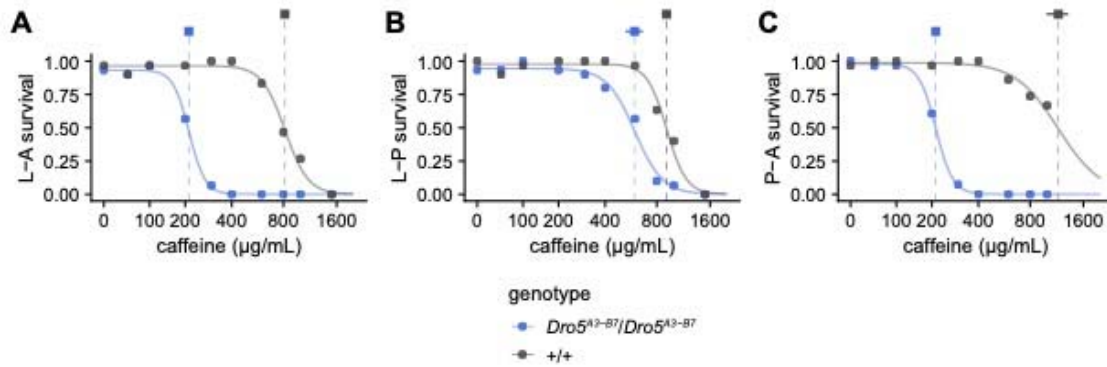

682

683 **Figure 4.** Developmental survival of *+/+* homozygotes (grey) and *Dro5<sup>A3-B7</sup>/Dro5<sup>A3-B7</sup>* homozygotes

684 (blue) on media containing 0–1,500 µg/mL caffeine. Curves are fitted log-logistic regression dose-

685 response models for each genotype. Dashed vertical lines and squares indicate the estimated LC<sub>50</sub>s

686 for each genotype, with the horizontal bar indicating the 95% CI. (A) L-A (larval-adult) survival. (B) L-P

687 (larval-pupal) survival. (C) P-A (pupal-adult) survival. Curves are fitted log-logistic regression dose-

688 response models for each genotype.

689 **3.5. Animals overexpressing CG31300 (*Dro5-1*) and CG13659 (*Dro5-7*) in**  
690 ***detoxification tissues have increased developmental tolerance to***  
691 ***caffeine***

692

693 As a complementary test of the involvement of Dro5 EcKLs in caffeine detoxification,  
694 we misexpressed individual Dro5 UAS-ORFs using the *HR-GAL4* driver, which  
695 expresses GAL4 in the midgut, Malpighian tubules and fat body (Chung et al., 2007),  
696 and conducted dose-response developmental toxicology assays to explore if  
697 misexpression increased tolerance to caffeine compared to a control genotype  
698 (*HR>yw*). Unfortunately, due to stock loss, we were unable to perform these  
699 experiments with UAS-*CG11893* (*Dro5-6*) and UAS-*CG31436* (*Dro5-10*) lines.  
700 Misexpression of both *CG31300* and *CG13659* significantly increased L-A LC<sub>50</sub>s  
701 (Fig. 5B), with LC<sub>50</sub> ratios of 1.43 (95% CI: 1.05, 1.81) and 1.40 (95% CI: 1.15, 1.65)  
702 respectively, compared to the control genotype, which was due to increased  
703 tolerance during the pupal stage (Fig. S4F) and not during the larval stage (Fig.  
704 S4D). These results are consistent with both *CG31300* and *CG13659* encoding  
705 protein products that mediate caffeine detoxification.

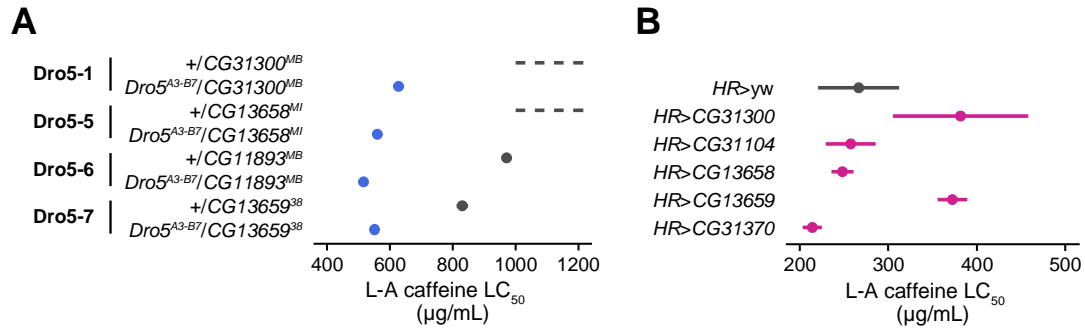

706

707 **Figure 5.** Larval–adult LC<sub>50</sub> values and 95% CIs of (A) single-gene disruption animals and (B) single-  
708 gene overexpression animals on caffeine media. (A) Heterozygotes possessing a single *Dro5* gene  
709 disruption allele and either a wild-type allele (+; grey) or a *Dro5*<sup>A3-B7</sup> allele (blue). Genotypes with a  
710 lack of dose-response effect have a dashed line to indicate an LC<sub>50</sub> value above 1,000 µg/mL. For full  
711 data and LC<sub>50</sub>s for larval–adult, larval–pupal and pupal–adult survival, see Fig. S3. *CG31300*<sup>MB</sup>,  
712 *CG31300*<sup>MB00063</sup>; *CG13658*<sup>MI</sup>, *CG13658*<sup>MI03110</sup>; *CG11893*<sup>MB</sup>, *CG11893*<sup>MB00360</sup>. (B) Offspring from  
713 crossing *HR-GAL4* homozygotes and either UAS-ORF responder homozygotes for five *Dro5* genes  
714 (purple) or homozygotes of the wild-type genetic background (*yw*, grey) on media containing 0–1,500  
715 µg/mL caffeine. The *HR*>*CG31300* genotype was not assayed on 1,500 µg/mL media. For full data  
716 and LC<sub>50</sub>s for larval–adult, larval–pupal and pupal–adult survival, see Fig. S4.

717 **3.6. *Dro5*<sup>A3-B7</sup> homozygotes have increased developmental susceptibility**  
718 **to kojic acid**

719

720 In addition to caffeine, we wished to test if *Dro5*<sup>A3-B7</sup> mutants had increased  
721 developmental susceptibility to other naturally occurring toxins compared to wild-type  
722 animals. We chose six hydroxylated compounds: quercetin, escin, esculin, curcumin,  
723 salicin and kojic acid. For the former four compounds—soluble in ethanol—we  
724 conducted single-dose developmental toxicology assays at 40 µg/mL (quercetin) or  
725 200 µg/mL (escin, esculin and curcumin), while for the latter two compounds—  
726 soluble in water—we conducted multiple-dose developmental toxicology assays.

727

728 *Dro5*<sup>A3-B7</sup> homozygotes were significantly more susceptible to kojic acid than wild-  
729 type animals, with LC<sub>50</sub> ratios of 0.67 (95% CI: 0.627, 0.71), 0.79 (95% CI: 0.76,  
730 0.82) and 0.64 (95% CI: 0.60, 0.68) for L-A, L-P and P-A survival, respectively (Fig.  
731 6), indicating reduced tolerance at both larval and pupal stages of development.  
732 However, no significant differences in L-A, L-P or P-A survival were found between  
733 *Dro5*<sup>A3-B7</sup> and wild-type animals on media containing quercetin, escin, esculin or  
734 curcumin (all  $p > 0.05$ ; Fig. S5). Salicin was also apparently non-toxic to both *Dro5*<sup>A3-  
735 B7</sup> and wild-type animals at concentrations up to 8,000 µg/mL, with no significant  
736 dose-response effect in our assays (Fig. S6). As the concentrations of quercetin,  
737 escin, esculin, curcumin and salicin used did not significantly produce development  
738 toxicity to wild-type individuals, it is possible that the doses used were not sufficient  
739 to discriminate between tolerance differences between the two genotypes, if such  
740 differences exist.

741

742 We also tested if *Dro5*<sup>A3-B7</sup> mutants had reduced tolerance to secondary metabolites  
743 produced by *Citrus* species, decomposing fruits of which are preferred  
744 developmental substrates for *D. melanogaster* (Dweck et al., 2013). We made semi-  
745 natural fruit media with the juices of grapefruits, oranges or mandarins, and  
746 conducted developmental viability assays with homozygous *Dro5*<sup>A3-B7</sup> and wild-type  
747 (*Dro5*<sup>A3-B7/+</sup>) animals. No significant differences were found between genotypes for  
748 each medium for L-A, L-P or P-A survival (all  $p > 0.05$ , Welch's two-sided t-test with

749 unequal variance; Fig. S7), indicating homozygosity of the *Dros*<sup>A3-B7</sup> allele does not  
750 affect developmental viability on any of the three fruit-based substrates.

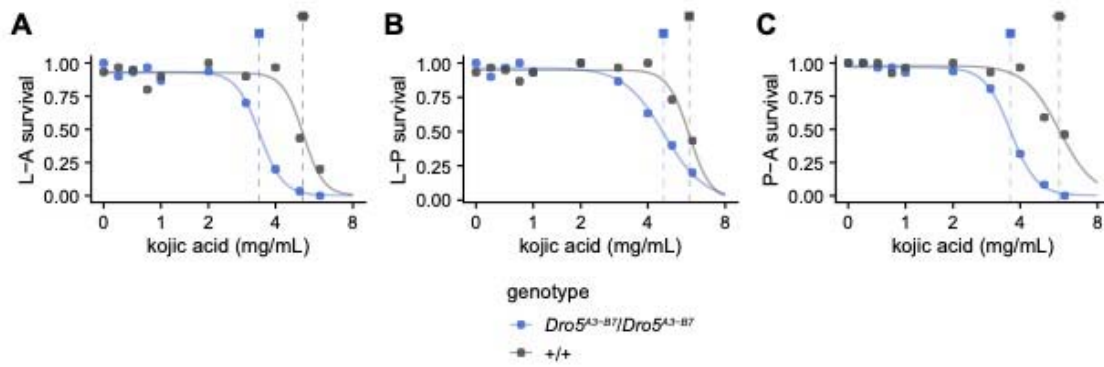

751

752 **Figure 6.** Developmental survival of *+/+* homozygotes (grey) and *Dro5<sup>A3-B7</sup>/Dro5<sup>A3-B7</sup>* homozygotes

753 (blue) on media containing 0–6 mg/mL kojic acid. Curves are fitted log-logistic regression dose-

754 response models for each genotype. Dashed vertical lines and squares indicate the estimated LC<sub>50</sub>s

755 for each genotype, with the horizontal bar indicating the 95% CI. (A) L-A (larval-adult) survival. (B) L-P

756 (larval-pupal) survival. (C) P-A (pupal-adult) survival. Curves are fitted log-logistic regression dose-

757 response models for each genotype.

758

## 759 **4. Discussion**

760

### 761 **4.1. Genetic evidence that one or more *Dro5* EcKLs in *D. melanogaster*** 762 ***confer caffeine tolerance***

763

764 In this study, we have conducted the first functional experiments testing the  
765 hypothesis that members of the EcKL gene family are involved in detoxification  
766 processes in insects. Taken together, the data presented here strongly suggest that  
767 one or more EcKL genes in the *Dro5* clade contribute to caffeine tolerance in *D.*  
768 *melanogaster* (Table 1): multiple *Dro5* genes are induced by ingesting caffeine in  
769 larvae (Fig. 1D); a loss-of-function allele of *CG31370* (*Dro5-8*) increases adult  
770 susceptibility to caffeine in the DGRP (Fig. 2B); animals lacking five of seven *Dro5*  
771 genes show decreased developmental survival on caffeine (Fig. 4); and  
772 misexpression of two *Dro5* genes—*CG31300* (*Dro5-1*) and *CG13659* (*Dro5-7*)—in  
773 detoxification tissues increase developmental survival on caffeine (Fig. 6). Data  
774 showing animals lacking five *Dro5* genes develop normally (Fig. 3), along with their  
775 detoxification-like transcriptional characteristics (Fig. 1; Scanlan et al., 2020), are  
776 also consistent with at least the majority of *Dro5* enzymes having  
777 exogenous/xenobiotic, rather than endogenous, substrates.

778

779 *CG13659* (*Dro5-7*) has the strongest lines of evidence linking it to caffeine tolerance,  
780 through transcriptional induction and both knockout and misexpression toxicological  
781 phenotypes (Table 1). As *CG13659* is strongly induced by larval caffeine ingestion  
782 (Fig. 1D) and is basally expressed in the larval fat body and Malpighian tubules (Fig.  
783 1C), this makes it likely that this gene would be involved in caffeine tolerance in wild-  
784 type animals. In contrast, while misexpression of *CG31300* (*Dro5-1*) reduced  
785 developmental susceptibility to caffeine, its lack of transcriptional response to  
786 caffeine (Fig. 1D), as well as its much lower basal expression in detoxification  
787 tissues (Leader et al., 2018), suggests that it is unlikely to contribute substantially to  
788 caffeine tolerance in wild-type animals. It is also possible that other *Dro5* genes,  
789 such as *CG11893* (*Dro5-6*) and *CG31436* (*Dro5-10*), are involved in caffeine  
790 tolerance in wild-type animals, but due to the non-comprehensiveness of our single-  
791 gene disruption and misexpression experiments, we were unable to test this further.

792

793 It is unclear whether *CG31370* (Dro5-8) also contributes to caffeine tolerance. While  
794 the *CG31370<sup>del</sup>* loss-of-function allele was associated with a reduction in adult  
795 survival on caffeine media in the DGRP (Fig. 2B), misexpression of *CG31370* in  
796 detoxification tissues surprisingly decreased survival on caffeine media during larval  
797 and pupal development (Fig. 6), suggesting it does not encode an enzyme that acts  
798 in caffeine detoxification. Due to the absence of either a full *Dro5*-null allele or a  
799 controlled genetic background line for the *CG31370<sup>M107438</sup>* TE-insertion allele, we  
800 were unable to test the developmental susceptibility of animals lacking *CG31370*  
801 function; we also did not test the tolerance of *CG31370*-misexpressing adults to  
802 caffeine. It is possible that *CG31370* encodes an enzyme that selectively acts in  
803 caffeine metabolism in adults but not pre-adult life stages; alternatively, the  
804 *CG31370<sup>del</sup>* allele may reduce caffeine tolerance by affecting the transcription of  
805 *CG13659*, which lies just upstream of *CG31370* (Fig. 2A) and—as previously  
806 stated—is a strong candidate for involvement in caffeine detoxification. While basal  
807 levels of expression of *CG13659* in adult females (the sex phenotyped by Najarro et  
808 al. (Najarro et al., 2015)) does not appear affected by homozygosity of *CG31370<sup>del</sup>*—  
809 the difference in mean  $\log_2(\text{FPKM})$  is 0.0778 (95% CI: -0.159, 0.423) between  
810 *CG31370<sup>wt</sup>* and *CG31370<sup>del</sup>* homozygotes (Everett et al., 2020)—we hypothesise  
811 that *CG31370<sup>del</sup>* may affect the transcriptional induction of *CG13659* by caffeine, by  
812 disrupting a downstream transcription factor-binding site. Alternatively, *CG31370<sup>del</sup>*  
813 may be in linkage disequilibrium with a truly causal structural variant at the *CG13659*  
814 locus that has not yet been genotyped in the DGRP.



815 **Table 1.** Collated evidence for the involvement of individual *Drosophila melanogaster* Dro5 EcKLs in  
 816 caffeine tolerance.

| Gene    | Nomenclature | Induction (Z) <sup>a</sup> | Induction (K) <sup>b</sup> | DGRP <sup>c</sup> | <i>Dro5</i> <sup>A3-B7</sup> <sup>d</sup> | KO L-A <sup>e</sup> | KO L-P <sup>f</sup> | KO P-A <sup>g</sup> | Misexpression <sup>h</sup> |
|---------|--------------|----------------------------|----------------------------|-------------------|-------------------------------------------|---------------------|---------------------|---------------------|----------------------------|
| CG31300 | Dro5-1       | No                         | No                         | -                 | Yes                                       | Yes                 | No                  | Yes                 | Yes                        |
| CG31104 | Dro5-2       | Strong                     | Weak                       | -                 | Yes                                       | N.D.                | N.D.                | N.D.                | No                         |
| CG13658 | Dro5-5       | Weak                       | No                         | -                 | Yes                                       | Yes                 | No                  | Yes                 | No                         |
| CG11893 | Dro5-6       | Weak                       | No                         | -                 | Yes                                       | Yes                 | Yes                 | Yes                 | N.D.                       |
| CG13659 | Dro5-7       | Strong                     | Weak                       | -                 | Yes                                       | Yes                 | Yes                 | Yes                 | Yes                        |
| CG31370 | Dro5-8       | No                         | No                         | Yes               | -                                         | N.D.                | N.D.                | N.D.                | No                         |
| CG31436 | Dro5-10      | Weak                       | Weak                       | -                 | -                                         | N.D.                | N.D.                | N.D.                | N.D.                       |

817 <sup>a</sup> Induction by 1,553 µg/mL caffeine in the Zhuo dataset (Fig. 1D); strong, > 3-fold; weak, ≤ 3-fold

818 <sup>b</sup> Induction by 1,500 µg/mL caffeine in Robin & Kee dataset (Fig. 1D); strong, > 3-fold; weak, ≤ 3-fold

819 <sup>c</sup> Association of genetic variation with caffeine-related phenotypes in the DGRP (Fig. 2); -, no

820 associated variation

821 <sup>d</sup> Disrupted in the *Dro5*<sup>A3-B7</sup> allele, which is associated with increased developmental susceptibility to  
 822 caffeine (Figs. 2 & 4); -, not disrupted

823 <sup>e</sup> Single-gene knockout (KO) increases larval–adult developmental caffeine susceptibility (Figs. 5A &  
 824 S3); N.D., not determined

825 <sup>f</sup> Single-gene knockout (KO) increases larval–pupal developmental caffeine susceptibility (Figs. 5A &  
 826 S3); N.D., not determined

827 <sup>g</sup> Single-gene knockout (KO) increases pupal–adult developmental caffeine susceptibility (Figs. 5A &  
 828 S3); N.D., not determined

829 <sup>h</sup> Transgenic misexpression in detoxification tissues increases developmental caffeine tolerance (Fig.  
 830 5B & S4); N.D., not determined

831

832 **4.2. A biochemical hypothesis for *EckL*-mediated caffeine detoxification**  
833 **by phosphorylation**

834

835 The molecular targets of caffeine have been comprehensively studied in humans  
836 and other vertebrates (Fredholm et al., 1999), but the same is not true in insects—  
837 while it is known that caffeine has acute effects on the insect nervous system  
838 (Mustard, 2014), as well as chronic effects on insect development (Nathanson, 1984;  
839 Nigsch et al., 1977), the molecular causes of caffeine toxicity in *D. melanogaster* and  
840 other insects are not well understood. Molecular targets of caffeine in the insect  
841 nervous system include the ryanodine receptor and phosphodiesterases, and  
842 possibly also adenosine receptors (the main neurological target in mammals) and  
843 dopamine receptors (Mustard, 2014), some or all of which are likely responsible for  
844 caffeine's acute effects on behaviour and physiology (Nathanson, 1984). Caffeine  
845 also inhibits proteins involved in DNA repair (Blasina et al., 1999; Tsabar et al., 2015;  
846 Zelensky et al., 2013) and increases the mutation rate *in vivo* (Kuhlmann et al.,  
847 1968), and *D. melanogaster* mutant animals with impaired genome stability are  
848 highly developmentally sensitive to caffeine (Li et al., 2013), strongly suggesting  
849 exposure to caffeine indirectly causes DNA damage *in vivo*; this mechanism is likely  
850 partially responsible for the chronic developmental toxicity of caffeine, exemplified in  
851 this study by death during metamorphosis. Feeding on food containing high  
852 concentrations of caffeine also causes death in *D. melanogaster* adults in 15–112  
853 hours (Najarro et al., 2015), although the molecular causes of this have not been  
854 studied in detail, despite the validation of tolerance loci likely involved in  
855 detoxification (Najarro et al., 2015).

856

857 While multiple lines of evidence converge on *CG13659* conferring tolerance to  
858 caffeine in *D. melanogaster*, due to the lack of hydroxyl groups on the caffeine  
859 molecule, a kinase's contribution to caffeine metabolism cannot be direct  
860 phosphorylation but the phosphorylation of one or more caffeine metabolites (*EckL*s  
861 belong to the Group 1 kinases, which only use hydroxyl groups as a phosphoryl  
862 acceptor; Kenyon et al., 2012). As such, we propose a biochemical hypothesis for  
863 the involvement of *CG13659* and/or other *EckL*s in the detoxification of caffeine (Fig.  
864 7), which entails the existence of four classes of caffeine metabolites, all of which are

865 produced by P450 enzymes: non-hydroxylated metabolites of much lower toxicity  
866 than caffeine; non-hydroxylated metabolites of comparable or greater toxicity than  
867 caffeine; hydroxylated metabolites of much lower toxicity than caffeine; and  
868 hydroxylated metabolites of comparable or greater toxicity than caffeine. We  
869 hypothesise that toxic hydroxylated metabolites preferentially affect DNA repair  
870 mechanisms or other targets that predominantly affect metamorphosis, and Dro5  
871 EcKs, such as CG13659, detoxify hydroxylated caffeine metabolites by  
872 phosphorylation, leading to a reduction in the inhibition of caffeine target proteins  
873 and increased survival on caffeine-containing media, with a bias towards conferring  
874 tolerance during metamorphosis at relatively low concentrations of caffeine (Fig. 7).

875

876 The plausibility of this hypothesis is hard to judge, given that relatively little is known  
877 about caffeine metabolism in *D. melanogaster* compared to other animals. Like  
878 mammals, adult flies metabolise caffeine to the non-hydroxylated compounds  
879 theobromine, paraxanthine and theophylline through the action of P450s, but do not  
880 produce 1,3,7-trimethyluric acid, a relatively common hydroxylated metabolite of  
881 caffeine in mammals (Bonati et al., 1984). However, *D. melanogaster* also produces  
882 an additional five unidentified metabolites, one of which—M2—is the second-most  
883 abundant caffeine metabolite in male flies two hours after exposure, accounting for  
884 34% of ingested caffeine (Coelho et al., 2015), suggesting its formation may be  
885 important for reducing the toxicity of caffeine; it is possible one or more of these  
886 unidentified metabolites are hydroxylated. Based on RNAi knockdown and  
887 radiolabelling experiments, Coelho *et al.* (2015) hypothesised that the M2 metabolite  
888 is produced by Cyp12d1 and then subsequently metabolised by one or both of  
889 Cyp6a8 and Cyp6d5, while theobromine is produced by Cyp6d5 and metabolised by  
890 Cyp6a8; independently, QTL mapping and RNAi experiments by Najarro *et al.*  
891 (2015) indicated that both *Cyp12d1* and *Cyp6d5* contribute to caffeine tolerance in  
892 adult flies. Taken together, these data suggest that the formation and/or further  
893 metabolism of M2 and theobromine, which together account for ~76% of  
894 metabolised caffeine (Coelho et al., 2015), strongly influence the tolerance of *D.*  
895 *melanogaster* to caffeine exposure. The presence of hydroxyl groups on any  
896 significantly abundant caffeine metabolites in *D. melanogaster* would produce a  
897 plausible substrate for Dro5 enzymes, including CG13659.

898

899 Additionally, we recently found that a non-synonymous variant (W260S) in another  
900 P450, *Cyp4s3*, is associated with developmental caffeine survival in the DGRP  
901 (Scanlan et al., 2020), based on a reanalysis of phenotype data from Montgomery *et*  
902 *al.* (2014); despite *Cyp4s3* not being induced by caffeine exposure in larvae or adults  
903 (Coelho et al., 2015; Willoughby et al., 2006), it may also be involved in caffeine  
904 metabolism, although its possible role is unclear.

905

906 Our biochemical hypothesis for the action of Dro5 EcKLs in caffeine detoxification  
907 relies on the sustained toxicity of hypothetical hydroxylated caffeine metabolites.  
908 While caffeine metabolites and other methylxanthines can have physiological effects  
909 in humans sometimes equal or exceeding that of caffeine itself (Benowitz et al.,  
910 1995; Geraets et al., 2006; Malki et al., 2006), only limited data currently exist on the  
911 differential toxicity of caffeine and its metabolites in insects: theobromine appears  
912 less toxic than caffeine in *D. melanogaster* adults (Matsagas et al., 2009); while  
913 caffeine, theophylline and theobromine are toxic to the pupal CNS of giant silkmoths  
914 (Lepidoptera: Bombyoidea); caffeine and theophylline are 3- to 4-fold more toxic than  
915 theobromine (Blaustein and Schneiderman, 1960); and theophylline and  
916 theobromine are not toxic at daily doses of 5–10 µg in *Vespa orientalis*  
917 (Hymenoptera: Vespoidea) and *Apis mellifera* (Hymenoptera: Apoidea), unlike  
918 caffeine (Ishay and Paniry, 1979). Additionally, despite being a canonical phase I  
919 detoxification reaction, hydroxylation can bioactivate some pro-toxic xenobiotic  
920 compounds (Harrop et al., 2018; Idda et al., 2020; Salgado and David, 2017). As the  
921 metabolism of caffeine is poorly understood at a fine level of detail even in model  
922 insect species like *D. melanogaster*, the relative change in toxicity of caffeine at each  
923 step of its metabolism in insects remains to be determined.

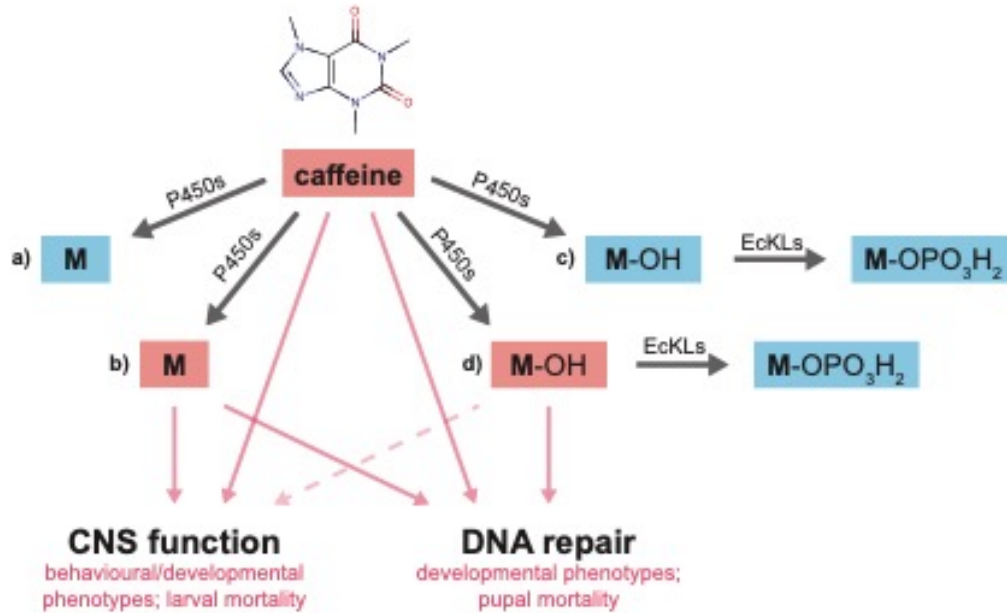

924

925 **Figure 7.** A biochemical hypothesis for the function of Dro5 EcKls in caffeine detoxification. Ingested  
926 caffeine is metabolised by P450 enzymes to four hypothetical types of metabolites: a) non-toxic non-  
927 hydroxylated metabolites; b) toxic non-hydroxylated metabolites; c) non-toxic hydroxylated  
928 metabolites; and d) toxic hydroxylated metabolites. Hydroxylated metabolites can be phosphorylated  
929 by EcKL enzymes to form non-toxic phosphate metabolites. Toxic metabolites negatively affect (pink  
930 arrows) CNS function and/or DNA repair pathways. Toxic hydroxylated metabolites inhibit DNA repair  
931 pathways more than targets in the CNS, explaining the greater caffeine susceptibility of Dro5 mutant  
932 animals—and the greater caffeine tolerance of Dro5 overexpression animals—during the pupal stage,  
933 due to the accumulation of DNA damage in the imaginal discs, compared to the larval stages, where  
934 behavioural effects predominate. Possible complexities of caffeine metabolism wherein metabolites  
935 are acted on sequentially by multiple P450s (as suggested by Coelho et al., 2015) have not been  
936 shown, for simplicity.

937 **4.3. How ecologically relevant is caffeine detoxification in *D.***  
938 ***melanogaster*?**

939

940 Caffeine is found in the leaves, fruits, seeds and/or flowers of a variety of plants,  
941 including species in the genera *Coffea*, *Camellia*, *Theobroma*, *Paullinia*, *Cola*, *Ilex*  
942 and *Citrus* (Anaya et al., 2006) and is primarily thought to be an antifeedant against  
943 invertebrate herbivores (Hollingsworth et al., 2002; Nathanson, 1984; Uefuji et al.,  
944 2005), although it can also function to enhance pollinator learning and memory,  
945 improving foraging rates (reviewed by Stevenson, 2020). *D. melanogaster* is a  
946 saprophage that feeds on rotting fruit substrates (Markow, 2019), which are unlikely  
947 to originate from the small, caffeine-rich fruits found in the *Coffea*, *Cola* and *Paullinia*  
948 genera. However, *Citrus* fruits produce highly favourable substrates for *D.*  
949 *melanogaster* (Dweck et al., 2013)—while caffeine is found in *Citrus* flowers, not  
950 fruits (Kretschmar and Baumann, 1999), *Citrus* trees typically produce large numbers  
951 of flowers (Iglesias et al., 2007), raising the possibility that fruits and flowers  
952 decompose together, forming a food substrate for *D. melanogaster* containing  
953 toxicologically relevant levels of caffeine. Whole *Citrus* flowers contain approximately  
954 318 nmol/g (62 µg/g) caffeine (Kretschmar and Baumann, 1999), meaning that a 1:1  
955 flower to fruit ratio—a plausible upper limit for what might be found in nature—would  
956 produce a developmental substrate with 31 µg/g caffeine. This is below the  
957 developmental LC<sub>50</sub>s determined for wild-type animals in this study but might  
958 produce adverse behavioural or developmental effects in natural environments,  
959 especially for non-adapted genotypes, producing selection for efficient caffeine  
960 detoxification. A diverse collection of *Drosophila* species other than *D. melanogaster*  
961 use *Citrus* spp. fruits as developmental substrates in nature (Hoenigsberg et al.,  
962 1977), suggesting the ability to detoxify caffeine and related methylxanthine  
963 compounds may have been present in the ancestor of all or most *Drosophila*  
964 species.

965

966 Alternatively, the ability to detoxify caffeine may be due to generalist detoxification  
967 mechanisms, possibly related to those metabolising other alkaloids unlikely to be in  
968 the natural diet of *D. melanogaster*, such as nicotine, carnegine and isoquinoline

969 alkaloids (Danielson et al., 1995; Fogleman, 2000; Highfill et al., 2017; Marriage et  
970 al., 2014).

971

#### 972 **4.4. EckL-mediated tolerance of kojic acid and other toxins**

973

974 The dramatic and substantial expansion of the Dro5 clade in the *Drosophila* genus  
975 (Scanlan et al., 2020) is suggestive of a role in detoxification processes relevant to  
976 the ecological niches of this group of largely saprophagous insects (Markow, 2019).  
977 In this study, we found preliminary evidence that Dro5 EckLs confer tolerance to the  
978 hydroxylated fungal secondary metabolite kojic acid (Fig. 6)—however, we did not  
979 perform further experiments to dissect which gene or genes disrupted in *Dro5*<sup>A3-B7</sup>  
980 homozygotes may be responsible. We decided to use kojic acid in our experiments  
981 because it is both toxic to *D. melanogaster* (Dobias et al., 1977) and produced as a  
982 secondary metabolite of known filamentous fungal competitors of *Drosophila* larvae  
983 (El-Kady et al., 2014; Rohlf et al., 2005). While the concentrations of kojic acid used  
984 were relatively high (up to 6 mg/mL or 0.6% w/v), they are likely to be ecologically  
985 relevant, as many strains of *Aspergillus* spp. and *Penicillium* spp. regularly produce  
986 more than 0.5% w/v kojic acid in culture (Beard and Walton, 1969; El-Kady et al.,  
987 2014). Given this, it is likely that *D. melanogaster* and other *Drosophila* spp. have  
988 evolved metabolic detoxification mechanisms to increase their tolerance to kojic acid.  
989 Essentially nothing is known about the metabolism of kojic acid in insects, although it  
990 is substantially metabolised to sulfate and glucuronide conjugates in rats (Burnett et  
991 al., 2010), suggesting similarly conjugation-heavy metabolism—such as  
992 phosphorylation via EckLs—could also occur in insects.

993

994 Other fungal secondary metabolites that are plausible substrates for EckLs are the  
995 hydroxylated mycotoxins citrinin and patulin, which are synthesised by various  
996 *Aspergillus* and *Penicillium* species (Paterson et al., 1987; Puel et al., 2010). Of  
997 note, CG31104 (Dro5-2), CG11893 (Dro5-6) and CG13659 (Dro5-7) are all  
998 transcriptionally induced by feeding on wild-type vs. secondary metabolite-deficient  
999 strains of *Aspergillus nidulans* (Trienens et al., 2017), raising the possibility that one  
1000 or more defensive compounds produced by *A. nidulans* specifically could also be  
1001 substrates for Dro5 EckLs.

1002

1003 We did not find evidence that *Dro5* genes contribute to tolerance to the plant  
1004 secondary metabolites quercetin, esculin, escin, curcumin and salicin, possibly due  
1005 to the use of indiscriminate toxin concentrations (Figs. S6 & S7). Salicin was an  
1006 attractive compound for use in this study because it is phosphorylated by *Lymantria*  
1007 *dispar* (Lepidoptera: Noctuoidea), along with four similar glycosides—arbutin, helicin,  
1008 phenol glycoside and catechol glucoside (Boeckler et al., 2016). Cyanogenic  
1009 glucosides present in cassava (*Manihot esculenta*) were also recently found to be  
1010 phosphorylated by the silverleaf whitefly, *Bemisia tabaci* (Hemiptera: Aleyrodoidea;  
1011 Easson et al., 2021), glycosidic metabolites of the drug midazolam are  
1012 phosphorylated in the locust *Schistocerca gregaria* (Orthoptera: Acridoidea; Olsen et  
1013 al., 2015), and phosphorylated glycosides are also formed by other species in the  
1014 orders Blattodea, Coleoptera, Dermaptera, Diptera and Lepidoptera (Ngah and  
1015 Smith, 1983). The phosphorylation of glycosides has been hypothesised to inhibit  
1016 hydrolysis post-ingestion, preventing the formation of toxic aglycones (Boeckler et  
1017 al., 2016)—indeed, phosphorylated linamarin metabolites cannot be hydrolysed to  
1018 cyanogenic aglycones by *B. tabaci* transglucosidases *in vitro* (Easson et al., 2021),  
1019 suggesting that phosphorylation can act directly on toxins before other metabolic  
1020 reactions have occurred. It is currently unknown if *D. melanogaster* can  
1021 phosphorylate xenobiotic glycosides, although glycosides—particularly those of  
1022 flavonoids—are abundant secondary metabolites present in the fruits of *Citrus* spp.  
1023 (Wang et al., 2017). However, in this study we did not find evidence for differences in  
1024 the tolerance of wild-type and *Dro5*<sup>A3-B7</sup> mutant animals feeding on semi-natural  
1025 *Citrus* fruit media (Fig. S7), suggesting either disruption of the five *EckL* genes is not  
1026 sufficient to significantly affect tolerance to the mixture of compounds present in  
1027 these diets, or that these genes do not contribute to tolerance of *Citrus* spp.  
1028 secondary metabolites at all.

1029

1030 Another possible substrate for *Dro5* *EckL*s, or indeed any detoxification-candidate  
1031 *EckL*s in *D. melanogaster*, is harmol, the only xenobiotic compound known to be  
1032 phosphorylated in this species (Baars et al., 1980). Harmol is a human metabolite of  
1033 harmine, a harmala alkaloid found in the ayahuasca plant *Banisteriopsis caapi* (Riba  
1034 et al., 2003), and may not be found in the natural diet of *D. melanogaster*, although  
1035 harmine appears only mildly developmentally toxic up to concentrations of at least



1036 200 µg/mL (Cui et al., 2020), suggesting it is efficiently detoxified, possibly through a  
1037 metabolic pathway that includes phosphorylation.

1038

1039 We note that the *D. melanogaster* EcKL gene *CHKov1* (Dro18-1) has been reported  
1040 as associated with resistance to the organophosphate (OP) insecticide azinphos-  
1041 methyl, supported by backcrossing a TE-insertion allele into a wild-type genetic  
1042 background and conducting adult survival assays (Aminetzach et al., 2005), but a  
1043 larger study using a developmental survival phenotype in the DGRP failed to find a  
1044 significant association between the *CHKov1* locus and OP resistance (Battlay et al.,  
1045 2016); however, TE-insertion and further-derived duplication alleles at *CHKov1* have  
1046 been convincingly linked to viral resistance (Magwire et al., 2012, 2011). Regardless  
1047 of the phenotypes associated with this locus, the alleles in question substantially  
1048 disrupt the coding region of *CHKov1* and are therefore unlikely to reflect the native  
1049 functions of EcKL enzymes.

1050

#### 1051 **4.5. Alternative hypotheses for results, study limitations and future** 1052 **research questions**

1053

1054 An alternative hypothesis explaining the results in this paper is that Dro5 genes are  
1055 involved in a general tolerance process to toxins and are not directly involved in  
1056 detoxification *per se*. This was hypothesised for the paralogous EcKLs *CG16898*  
1057 (*Dro26-1*) and *CG33301* (*Dro26-2*), variants near which are associated with  
1058 resistance to multiple, chemically unrelated toxic stresses (Scanlan et al., 2020). If  
1059 this alternative hypothesis is true, it may point towards the existence of an  
1060 undiscovered generalist toxin-response pathway in *D. melanogaster*, as Dro5 genes  
1061 (and *Dro26-1* and *Dro26-2*) are not transcriptionally regulated by the ROS-sensitive  
1062 CncC pathway (Misra et al., 2011), yet respond to the ingestion of many different  
1063 xenobiotic compounds (Scanlan et al., 2020). Curiously, *CG13659*, *CG11893* and  
1064 *CG16898* (but not other EcKLs) may be positively regulated in larvae by XBP1  
1065 (Huang et al., 2017), an evolutionarily conserved physiological stress-response  
1066 transcription factor that mediates sensitivity to oxidative stress (Liu et al., 2009) and  
1067 may be a good candidate for mediating toxin responses in *D. melanogaster*.

1068

1069 This study is limited by the non-comprehensive nature of some of our experiments,  
1070 such as a lack of data on the changes in caffeine susceptibility upon *CG11893*  
1071 (*Dro5-6*) and *CG31436* (*Dro5-10*) misexpression, as well as a lack of single-gene  
1072 disruption data for *CG31104* (*Dro5-2*), *CG31370* (*Dro5-8*) and *CG31436*, as well as  
1073 the lack of a full seven-gene *Dro5* null allele. Some toxicological assays were also  
1074 conducted with a limited caffeine concentration range, which should be replicated in  
1075 the future to properly calculate  $LC_{50}$ s. This study is also limited by its use of genetic  
1076 experiments alone to test a detoxification hypothesis, which ideally should be done  
1077 through a combination of genetic, toxicological and biochemical experiments.  
1078 Radiolabelled or isotope-labelled caffeine metabolite tracing, combined with *Dro5*  
1079 gene knockout or misexpression, should determine if phosphate conjugates of  
1080 caffeine metabolites are indeed produced by *Dro5* enzymes, an approach that could  
1081 be complemented with *in vitro* studies of *Dro5* enzyme activity and/or structure.

1082

1083 Future work could also focus on adult caffeine susceptibility and whether it is altered  
1084 by any of the genetic manipulations described in this study; the caffeine susceptibility  
1085 of the homozygous *CG31370<sup>del</sup>* genotype also needs to be validated through further  
1086 toxicological experiments. More tissue-specific misexpression and knockout  
1087 experiments, as well as explorations of tissue-specific induction by caffeine  
1088 exposure, could improve our understanding of how and where *CG13659* (*Dro5-7*)  
1089 confers caffeine tolerance. Further experiments are also clearly needed to explore  
1090 the relationship between *Dro5* EckLs and kojic acid, as well as other fungal  
1091 secondary metabolites and ecologically relevant toxins for *D. melanogaster*, which  
1092 could be probed with fungal-larval competition assays ala. Trienens *et al.* (2010).

1093

## 1094 **5. Summary**

1095

1096 This study has provided the first experimental evidence that insect EckL genes are  
1097 involved in detoxification in the model insect *Drosophila melanogaster*. Multiple lines  
1098 of evidence have linked the *Dro5* genes—a large, dynamic clade containing many  
1099 detoxification candidate genes (Scanlan *et al.*, 2020)—to tolerance of the plant  
1100 alkaloid caffeine, and suggest an additional association with the fungal secondary  
1101 metabolite kojic acid, both of which may be ecologically relevant toxins for *D.*

1102 *melanogaster*. This work lays the groundwork for future research into detoxicative  
1103 kinases and may lead to a deeper understanding of caffeine metabolism in insects.  
1104

1105 **Funding:**

1106 This work was supported by an Australian Government Research Training Program  
1107 (RTP) Scholarship.

1108

1109

1110 **Author contributions:**

1111 **Jack L Scanlan:** Conceptualization, Methodology, Formal Analysis, Investigation,  
1112 Writing – Original Draft, Writing – Review & Editing, Visualization.

1113 **Paul Battlay:** Methodology, Formal Analysis, Writing – Review & Editing.

1114 **Charles Robin:** Conceptualization, Writing – Review & Editing, Supervision, Project  
1115 administration.

1116

1117

1118 **Acknowledgments:**

1119 The authors would like to thank Simon Bullock for the pCFD6 plasmid, the  
1120 Drosophila Genomics Resource Center for the UAS-ORF plasmids, Jin Kee for initial  
1121 insights into transcriptomic data, and Philip Batterham and Trent Perry for *Drosophila*  
1122 stocks.

1123

1124 **References**

1125

1126

1127 Abbott, W.S., 1925. A Method of Computing the Effectiveness of an Insecticide.

1128 *Journal of Economic Entomology* 18, 265–267.

1129 <https://doi.org/10.1093/jee/18.2.265a>

1130 Aminetzach, Y.T., Macpherson, J.M., Petrov, D.A., 2005. Pesticide resistance via

1131 transposition-mediated adaptive gene truncation in *Drosophila*. *Science* 309, 764–

1132 767. <https://doi.org/10.1126/science.1112699>

1133 Anaya, A.L., Cruz-Ortega, R., Waller, G.R., 2006. Metabolism and ecology of purine

1134 alkaloids. *Frontiers in Bioscience-Landmark* 11, 2354–2370.

1135 <https://doi.org/10.2741/1975>

1136 Baars, A.J., Zijlstra, J.A., Jansen, M., Vogel, E., Breimer, D.D., 1980.

1137 Biotransformation and Spectral Interaction of Xenobiotics with Subcellular

1138 Fractions from *Drosophila Melanogaster*, in: *Further Studies in the Assessment of*

1139 *Toxic Actions*. pp. 54–58. [https://doi.org/10.1007/978-3-642-67729-8\\_11](https://doi.org/10.1007/978-3-642-67729-8_11)

1140 Battlay, P., Schmidt, J.M., Fournier-Level, A., Robin, C., 2016. Genomic and

1141 Transcriptomic Associations Identify a New Insecticide Resistance Phenotype for

1142 the Selective Sweep at the *Cyp6g1* Locus of *Drosophila melanogaster*. *G3*

1143 (Bethesda, Md.) g3.116.031054. <https://doi.org/10.1534/g3.116.031054>

1144 Beard, R.L., Walton, G.S., 1969. Kojic acid as an insecticidal mycotoxin. *Journal of*

1145 *Invertebrate Pathology* 14, 53–59. [https://doi.org/10.1016/0022-2011\(69\)90010-x](https://doi.org/10.1016/0022-2011(69)90010-x)

1146 Benowitz, N.L., Jacob, P., Mayan, H., Denaro, C., 1995. Sympathomimetic effects of

1147 paraxanthine and caffeine in humans. *Clinical Pharmacology & Therapeutics* 58,

1148 684–691. [https://doi.org/10.1016/0009-9236\(95\)90025-x](https://doi.org/10.1016/0009-9236(95)90025-x)

1149 Bernhardt, R., 2006. Cytochromes P450 as versatile biocatalysts. *Journal of*

1150 *biotechnology* 124, 128–145. <https://doi.org/10.1016/j.jbiotec.2006.01.026>

- 1151 Bischof, J., Maeda, R.K., Hediger, M., Karch, F., Basler, K., 2007. An optimized  
1152 transgenesis system for *Drosophila* using germ-line-specific phiC31 integrases.  
1153 PNAS 104, 3312–3317. <https://doi.org/10.1073/pnas.0611511104>
- 1154 Bischof, J., Sheils, E.M., Bjorklund, M., Basler, K., 2014. Generation of a transgenic  
1155 ORFeome library in *Drosophila*. Nature Protocols 9, 1607–1620.  
1156 <https://doi.org/10.1038/nprot.2014.105>
- 1157 Blasina, A., Price, B.D., Turenne, G.A., McGowan, C.H., 1999. Caffeine inhibits the  
1158 checkpoint kinase ATM. Current Biology 9, 1135–1138.  
1159 [https://doi.org/10.1016/s0960-9822\(99\)80486-2](https://doi.org/10.1016/s0960-9822(99)80486-2)
- 1160 Blaustein, M.P., Schneiderman, H.A., 1960. A brief survey of the effects of potential  
1161 antimetabolites and enzymes on the development of giant silkmoths. J Insect  
1162 Physiol 5, 143–159. [https://doi.org/10.1016/0022-1910\(60\)90039-1](https://doi.org/10.1016/0022-1910(60)90039-1)
- 1163 Bock, K.W., 2016. The UDP-glycosyltransferase (UGT) superfamily expressed in  
1164 humans, insects and plants: Animal–plant arms-race and co-evolution.  
1165 Biochemical Pharmacology 99, 11–17. <https://doi.org/10.1016/j.bcp.2015.10.001>
- 1166 Boeckler, G.A., Paetz, C., Feibicke, P., Gershenzon, J., Unsicker, S.B., 2016.  
1167 Metabolism of poplar salicinoids by the generalist herbivore *Lymantria dispar*  
1168 (Lepidoptera). Insect Biochemistry and Molecular Biology 78, 39–49.  
1169 <https://doi.org/10.1016/j.ibmb.2016.08.001>
- 1170 Bonati, M., Latini, R., Tognoni, G., Young, J.F., Garattini, S., 1984. Interspecies  
1171 Comparison of In Vivo Caffeine Pharmacokinetics in Man, Monkey, Rabbit, Rat  
1172 and Mouse. Drug Metab Rev 15, 1355–1383.  
1173 <https://doi.org/10.3109/03602538409029964>
- 1174 Burnett, C.L., Bergfeld, W.F., Belsito, D.V., Hill, R.A., Klaassen, C.D., Liebler, D.C.,  
1175 Marks, J.G., Shank, R.C., Slaga, T.J., Snyder, P.W., Andersen, F.A., 2010. Final  
1176 Report of the Safety Assessment of Kojic Acid as Used in Cosmetics:  
1177 International Journal of Toxicology 29, 244S-273S.  
1178 <https://doi.org/10.1177/1091581810385956>

- 1179 Chung, H., Bogwitz, M.R., McCart, C., Andrianopoulos, A., French-Constant, R.H.,  
1180 Batterham, P., Daborn, P.J., 2007. Cis-regulatory elements in the Accord  
1181 retrotransposon result in tissue-specific expression of the *Drosophila*  
1182 *melanogaster* insecticide resistance gene *Cyp6g1*. *Genetics* 175, 1071–1077.  
1183 <https://doi.org/10.1534/genetics.106.066597>
- 1184 Coelho, A., Fraichard, S., Goff, G.L., Faure, P., Artur, Y., Ferveur, J.-F., Heydel, J.-  
1185 M., 2015. Cytochrome P450-Dependent Metabolism of Caffeine in *Drosophila*  
1186 *melanogaster*. *PLoS ONE* 10, e0117328.  
1187 <https://doi.org/10.1371/journal.pone.0117328>
- 1188 Cui, G., Yuan, H., Jiang, Z., Zhang, J., Sun, Z., Zhong, G., 2020. Natural harmine  
1189 negatively regulates the developmental signaling network of *Drosophila*  
1190 *melanogaster* (Drosophilidae: Diptera) in vivo. *Ecotox Environ Safe* 190, 110134.  
1191 <https://doi.org/10.1016/j.ecoenv.2019.110134>
- 1192 Danielson, P.B., Letman, J.A., Fogleman, J.C., 1995. Alkaloid metabolism by  
1193 cytochrome P-450 enzymes in *Drosophila melanogaster*. *Comparative*  
1194 *Biochemistry and Physiology Part B: Biochemistry and Molecular Biology* 110,  
1195 683–688. [https://doi.org/10.1016/0305-0491\(94\)00214-f](https://doi.org/10.1016/0305-0491(94)00214-f)
- 1196 Dobias, J., Nemeč, P., Brtko, J., 1977. The inhibitory effect of kojic acid and its two  
1197 derivatives on the development of *Drosophila melanogaster*. *Biologica (Bratislava)*  
1198 32, 417–421.
- 1199 Dweck, H.K.M., Ebrahim, S.A.M., Kromann, S., Bown, D., Hillbur, Y., Sachse, S.,  
1200 Hansson, B.S., Stensmyr, M.C., 2013. Olfactory Preference for Egg Laying on  
1201 Citrus Substrates in *Drosophila*. *Current Biology* 23, 2472–2480.  
1202 <https://doi.org/10.1016/j.cub.2013.10.047>
- 1203 Easson, M.L.A.E., Malka, O., Paetz, C., Hojná, A., Reichelt, M., Stein, B., Brunschot,  
1204 S. van, Feldmesser, E., Campbell, L., Colvin, J., Winter, S., Morin, S.,  
1205 Gershenzon, J., Vassão, D.G., 2021. Activation and detoxification of cassava  
1206 cyanogenic glucosides by the whitefly *Bemisia tabaci*. *Sci Rep-uk* 11, 13244.  
1207 <https://doi.org/10.1038/s41598-021-92553-w>

- 1208 El-Kady, I.A., Zohri, A.N.A., Hamed, S.R., 2014. Kojic Acid Production from Agro-  
1209 Industrial By-Products Using Fungi. *Biotechnology Research International* 2014,  
1210 1–10. <https://doi.org/10.1155/2014/642385>
- 1211 Enayati, A.A., Ranson, H., Hemingway, J., 2005. Insect glutathione transferases and  
1212 insecticide resistance. *Insect Molecular Biology* 14, 3–8.  
1213 <https://doi.org/10.1111/j.1365-2583.2004.00529.x>
- 1214 Everett, L.J., Huang, W., Zhou, S., Carbone, M.A., Lyman, R.F., Arya, G.H., Geisz,  
1215 M.S., Ma, J., Morgante, F., Armour, G.S., Turlapati, L., Anholt, R.R.H., Mackay,  
1216 T.F.C., 2020. Gene expression networks in the *Drosophila* Genetic Reference  
1217 Panel. *Genome Research* 30, 485–496. <https://doi.org/10.1101/gr.257592.119>
- 1218 Fogleman, J.C., 2000. Response of *Drosophila melanogaster* to selection for P450-  
1219 mediated resistance to isoquinoline alkaloids. *Chemico-Biological Interactions*  
1220 125, 93–105. [https://doi.org/10.1016/s0009-2797\(99\)00161-1](https://doi.org/10.1016/s0009-2797(99)00161-1)
- 1221 Fredholm, B.B., Bättig, K., Holmén, J., Nehlig, A., Zvartau, E.E., 1999. Actions of  
1222 Caffeine in the Brain with Special Reference to Factors That Contribute to Its  
1223 Widespread Use. *Pharmacological Reviews* 51, 83–133.  
1224 <https://doi.org/10.1002/ardp.19913240502>
- 1225 Geraets, L., Moonen, H.J.J., Wouters, E.F.M., Bast, A., Hageman, G.J., 2006.  
1226 Caffeine metabolites are inhibitors of the nuclear enzyme poly(ADP-  
1227 ribose)polymerase-1 at physiological concentrations. *Biochemical Pharmacology*  
1228 72, 902–910. <https://doi.org/10.1016/j.bcp.2006.06.023>
- 1229 Gratz, S.J., Ukken, F.P., Rubinstein, C.D., Thiede, G., Donohue, L.K., Cummings,  
1230 A.M., O'Connor-Giles, K.M., 2014. Highly Specific and Efficient CRISPR/Cas9-  
1231 Catalyzed Homology-Directed Repair in *Drosophila*. *Genetics* 196, 961–971.  
1232 <https://doi.org/10.1534/genetics.113.160713>
- 1233 Harrop, T.W., Denecke, S., Yang, Y.T., Chan, J., Daborn, P.J., Perry, T., Batterham,  
1234 P., 2018. Evidence for activation of nitenpyram by a mitochondrial cytochrome  
1235 P450 in *Drosophila melanogaster*. *Pest Management Science* 74, 1616–1622.  
1236 <https://doi.org/10.1002/ps.4852>



- 1237 Highfill, C.A., Tran, J.H., Nguyen, S.K.T., Moldenhauer, T.R., Wang, X., Macdonald,  
1238 S.J., 2017. Naturally Segregating Variation at Ugt86Dd Contributes to Nicotine  
1239 Resistance in *Drosophila melanogaster*. *Genetics* 207, 311–325.  
1240 <https://doi.org/10.1534/genetics.117.300058>
- 1241 Ho, J., Tumkaya, T., Aryal, S., Choi, H., Claridge-Chang, A., 2019. Moving beyond P  
1242 values: data analysis with estimation graphics. *Nature Methods* 16, 565–566.  
1243 <https://doi.org/10.1038/s41592-019-0470-3>
- 1244 Hoang, D.T., Chernomor, O., Haeseler, A. von, Minh, B.Q., Vinh, L.S., 2018.  
1245 UFBoot2: Improving the Ultrafast Bootstrap Approximation. *Molecular biology and*  
1246 *evolution* 35, 518–522. <https://doi.org/10.1093/molbev/msx281>
- 1247 Hoenigsberg, H.F., Palomino, J.J., Chiappe, C., Rojas, G.G., Cañas, B.M., 1977.  
1248 Population genetics in the American tropics □: XI. Seasonal and temporal  
1249 variations in relative frequencies of species belonging to the Willistoni group in  
1250 Colombia. *Oecologia* 27, 295–304. <https://doi.org/10.1007/bf00345562>
- 1251 Hollingsworth, R.G., Armstrong, J.W., Campbell, E., 2002. Caffeine as a repellent for  
1252 slugs and snails. *Nature* 417, 915–916. <https://doi.org/10.1038/417915a>
- 1253 Huang, H.-W., Zeng, X., Rhim, T., Ron, D., Ryoo, H.D., 2017. The requirement of  
1254 IRE1 and XBP1 in resolving physiological stress during *Drosophila* development.  
1255 *J Cell Sci* 130, 3040–3049. <https://doi.org/10.1242/jcs.203612>
- 1256 Ibanez, S., Gallet, C., Després, L., 2012. Plant insecticidal toxins in ecological  
1257 networks. *Toxins* 4, 228–243. <https://doi.org/10.3390/toxins4040228>
- 1258 Idda, T., Bonas, C., Hoffmann, J., Bertram, J., Quinete, N., Schettgen, T., Fietkau,  
1259 K., Esser, A., Stope, M.B., Leijs, M.M., Baron, J.M., Kraus, T., Voigt, A., Ziegler,  
1260 P., 2020. Metabolic activation and toxicological evaluation of polychlorinated  
1261 biphenyls in *Drosophila melanogaster*. *Sci Rep-uk* 10, 21587.  
1262 <https://doi.org/10.1038/s41598-020-78405-z>
- 1263 Iglesias, D.J., Cercós, M., Colmenero-Flores, J.M., Naranjo, M.A., Ríos, G., Carrera,  
1264 E., Ruiz-Rivero, O., Lliso, I., Morillon, R., Tadeo, F.R., Talon, M., 2007.

- 1265 Physiology of citrus fruiting. *Brazilian Journal of Plant Physiology* 19, 333–362.  
1266 <https://doi.org/10.1590/s1677-04202007000400006>
- 1267 Ishay, J.S., Paniry, V.A., 1979. Effects of caffeine and various xanthines on hornets  
1268 and bees. *Psychopharmacology* 65, 299–309. <https://doi.org/10.1007/bf00492219>
- 1269 Joußen, N., Agnolet, S., Lorenz, S., Schöne, S.E., Ellinger, R., Schneider, B.,  
1270 Heckel, D.G., 2012. Resistance of Australian *Helicoverpa armigera* to fenvalerate  
1271 is due to the chimeric P450 enzyme CYP337B3. *PNAS* 109, 15206–15211.  
1272 <https://doi.org/10.1073/pnas.1202047109>
- 1273 Kenyon, C.P., Roth, R.L., Westhuyzen, C.W. van der, Parkinson, C.J., 2012.  
1274 Conserved phosphoryl transfer mechanisms within kinase families and the role of  
1275 the C8 proton of ATP in the activation of phosphoryl transfer. *Bmc Res Notes* 5,  
1276 131. <https://doi.org/10.1186/1756-0500-5-131>
- 1277 Kretschmar, J.A., Baumann, T.W., 1999. Caffeine in Citrus flowers. *Phytochemistry*  
1278 52, 19–23. [https://doi.org/10.1016/s0031-9422\(99\)00119-3](https://doi.org/10.1016/s0031-9422(99)00119-3)
- 1279 Kuhlmann, W., Fromme, H.G., Heege, E.M., Ostertag, W., 1968. The mutagenic  
1280 action of caffeine in higher organisms. *Cancer Research* 28, 2375–2389.
- 1281 Leader, D.P., Krause, S.A., Pandit, A., Davies, S.A., Dow, J.A.T., 2018. FlyAtlas 2: a  
1282 new version of the *Drosophila melanogaster* expression atlas with RNA-Seq,  
1283 miRNA-Seq and sex-specific data. *Nucleic Acids Research* 46, D809–D815.  
1284 <https://doi.org/10.1093/nar/gkx976>
- 1285 LeBrun, E.G., Jones, N.T., Gilbert, L.E., 2014. Chemical Warfare Among Invaders: A  
1286 Detoxification Interaction Facilitates an Ant Invasion. *Science* 343, 1014–1017.  
1287 <https://doi.org/10.1126/science.1245833>
- 1288 Li, S., Yu, X., Feng, Q., 2019. Fat Body Biology in the Last Decade. *Annu Rev*  
1289 *Entomol* 64, 315–333. <https://doi.org/10.1146/annurev-ento-011118-112007>
- 1290 Li, X., Zhuo, R., Tiong, S., Cara, F.D., King-Jones, K., Hughes, S.C., Campbell, S.D.,  
1291 Wevrick, R., 2013. The Smc5/Smc6/MAGE Complex Confers Resistance to

- 1292 Caffeine and Genotoxic Stress in *Drosophila melanogaster*. *PLoS ONE* 8,  
1293 e59866. <https://doi.org/10.1371/journal.pone.0059866>
- 1294 Liu, C., Wang, J.-L., Zheng, Y., Xiong, E.-J., Li, J.-J., Yuan, L.-L., Yu, X.-Q., Wang,  
1295 Y.-F., 2014. Wolbachia-induced paternal defect in *Drosophila* is likely by  
1296 interaction with the juvenile hormone pathway. *Insect Biochemistry and Molecular*  
1297 *Biology* 49, 49–58. <https://doi.org/10.1016/j.ibmb.2014.03.014>
- 1298 Liu, Y., Adachi, M., Zhao, S., Hareyama, M., Koong, A.C., Luo, D., Rando, T.A.,  
1299 Imai, K., Shinomura, Y., 2009. Preventing oxidative stress: a new role for XBP1.  
1300 *Cell Death Differ* 16, 847–857. <https://doi.org/10.1038/cdd.2009.14>
- 1301 Lund, A.H., Duch, M., Pedersen, F.S., 1996. Increased cloning efficiency by  
1302 temperature-cycle ligation. *Nucleic Acids Research* 24, 800–801.  
1303 <https://doi.org/10.1093/nar/24.4.800>
- 1304 Mackay, T.F.C., Richards, S., Stone, E.A., Barbadilla, A., Ayroles, J.F., Zhu, D.,  
1305 Casillas, S., Han, Y., Magwire, M.M., Cridland, J.M., Richardson, M.F., Anholt,  
1306 R.R.H., Barrón, M., Bess, C., Blankenburg, K.P., Carbone, M.A., Castellano, D.,  
1307 Chaboub, L., Duncan, L., Harris, Z., Javaid, M., Jayaseelan, J.C., Jhangiani, S.N.,  
1308 Jordan, K.W., Lara, F., Lawrence, F., Lee, S.L., Librado, P., Linheiro, R.S.,  
1309 Lyman, R.F., Mackey, A.J., Munidasa, M., Muzny, D.M., Nazareth, L., Newsham,  
1310 I., Perales, L., Pu, L.-L., Qu, C., Ràmia, M., Reid, J.G., Rollmann, S.M., Rozas, J.,  
1311 Saada, N., Turlapati, L., Worley, K.C., Wu, Y.-Q., Yamamoto, A., Zhu, Y.,  
1312 Bergman, C.M., Thornton, K.R., Mittelman, D., Gibbs, R.A., 2012. The *Drosophila*  
1313 *melanogaster* Genetic Reference Panel. *Nature* 482, 173–178.  
1314 <https://doi.org/10.1038/nature10811>
- 1315 Magwire, M.M., Bayer, F., Webster, C.L., Cao, C., Jiggins, F.M., 2011. Successive  
1316 Increases in the Resistance of *Drosophila* to Viral Infection through a Transposon  
1317 Insertion Followed by a Duplication. *PLoS Genetics* 7, e1002337.  
1318 <https://doi.org/10.1371/journal.pgen.1002337>
- 1319 Magwire, M.M., Fabian, D.K., Schweyen, H., Cao, C., Longdon, B., Bayer, F.,  
1320 Jiggins, F.M., 2012. Genome-Wide Association Studies Reveal a Simple Genetic

- 1321 Basis of Resistance to Naturally Coevolving Viruses in *Drosophila melanogaster*.  
1322 PLoS Genetics 8, e1003057. <https://doi.org/10.1371/journal.pgen.1003057>
- 1323 Malki, A.M., Gentry, J., Evans, S.C., 2006. Differential effect of selected  
1324 methylxanthine derivatives on radiosensitization of lung carcinoma cells.  
1325 Experimental oncology 28, 16–24.
- 1326 Markow, T.A., 2019. Host use and host shifts in *Drosophila*. Curr Opin Insect Sci 31,  
1327 139–145. <https://doi.org/10.1016/j.cois.2019.01.006>
- 1328 Marriage, T.N., King, E.G., Long, A.D., Macdonald, S.J., 2014. Fine-Mapping  
1329 Nicotine Resistance Loci in *Drosophila* Using a Multiparent Advanced Generation  
1330 Inter-Cross Population. Genetics 198, 45–57.  
1331 <https://doi.org/10.1534/genetics.114.162107>
- 1332 Matsugas, K., Lim, D.B., Horwitz, M., Rizza, C.L., Mueller, L.D., Villeponteau, B.,  
1333 Rose, M.R., 2009. Long-Term Functional Side-Effects of Stimulants and  
1334 Sedatives in *Drosophila melanogaster*. Plos One 4, e6578.  
1335 <https://doi.org/10.1371/journal.pone.0006578>
- 1336 Misra, J.R., Horner, M.A., Lam, G., Thummel, C.S., 2011. Transcriptional regulation  
1337 of xenobiotic detoxification in *Drosophila*. Genes & Development 25, 1796–1806.  
1338 <https://doi.org/10.1101/gad.17280911>
- 1339 Mitchell, A., Chang, H.-Y., Daugherty, L., Fraser, M., Hunter, S., Lopez, R.,  
1340 McAnulla, C., McMenamin, C., Nuka, G., Pesseat, S., Sangrador-Vegas, A.,  
1341 Scheremetjew, M., Rato, C., Yong, S.-Y., Bateman, A., Punta, M., Attwood, T.K.,  
1342 Sigrist, C.J.A., Redaschi, N., Rivoire, C., Xenarios, I., Kahn, D., Guyot, D., Bork,  
1343 P., Letunic, I., Gough, J., Oates, M., Haft, D., Huang, H., Natale, D.A., Wu, C.H.,  
1344 Orengo, C., Sillitoe, I., Mi, H., Thomas, P.D., Finn, R.D., 2014. The InterPro  
1345 protein families database: the classification resource after 15 years. Nucleic Acids  
1346 Research 43, D213–D221. <https://doi.org/10.1093/nar/gku1243>
- 1347 Mitchell, S.C., 2015. Xenobiotic conjugation with phosphate – a metabolic rarity.  
1348 Xenobiotica 46, 743–756. <https://doi.org/10.3109/00498254.2015.1109161>

- 1349 Montgomery, S.L., Vorobjeikina, D., Huang, W., Mackay, T.F.C., Anholt, R.R.H.,  
1350 Rand, M.D., 2014. Genome-Wide Association Analysis of Tolerance to  
1351 Methylmercury Toxicity in *Drosophila* Implicates Myogenic and Neuromuscular  
1352 Developmental Pathways. *PLoS ONE* 9, e110375.  
1353 <https://doi.org/10.1371/journal.pone.0110375>
- 1354 Mustard, J.A., 2014. The buzz on caffeine in invertebrates: effects on behavior and  
1355 molecular mechanisms. *Cellular and molecular life sciences* □: CMLS 71, 1375–  
1356 1382. <https://doi.org/10.1007/s00018-013-1497-8>
- 1357 Najarro, M.A., Hackett, J.L., Smith, B.R., Highfill, C.A., King, E.G., Long, A.D.,  
1358 Macdonald, S.J., 2015. Identifying Loci Contributing to Natural Variation in  
1359 Xenobiotic Resistance in *Drosophila*. *PLoS Genetics* 11, e1005663.  
1360 <https://doi.org/10.1371/journal.pgen.1005663>
- 1361 Nathanson, J.A., 1984. Caffeine and related methylxanthines: possible naturally  
1362 occurring pesticides. *Science* 226, 184–187.  
1363 <https://doi.org/10.1126/science.6207592>
- 1364 Ngah, W.Z., Smith, J.N., 1983. Acidic conjugate of phenols in insects; glucoside  
1365 phosphate and glucoside sulphate derivatives. *Xenobiotica* 13, 383–389.  
1366 <https://doi.org/10.3109/00498258309052276>
- 1367 Nigsch, J., Graf, U., Würzler, F.E., 1977. Caffeine Toxicity in *Drosophila* Strains  
1368 Having Different Mms Sensitivities. *Mutation Research* 43, 57–63.
- 1369 Oakeshott, J.G., Claudianos, C., Campbell, P.M., Newcomb, R.D., Russell, R.J.,  
1370 2005. Biochemical Genetics and Genomics of Insect Esterases. *Comprehensive*  
1371 *Molecular Insect Science* 309–381. [https://doi.org/10.1016/b0-44-451924-](https://doi.org/10.1016/b0-44-451924-6/00073-9)  
1372 [6/00073-9](https://doi.org/10.1016/b0-44-451924-6/00073-9)
- 1373 Olsen, L.R., Gabel-Jensen, C., Wubshet, S.G., Kongstad, K.T., Janfelt, C., Badolo,  
1374 L., Hansen, S.H., 2015. Characterization of midazolam metabolism in locusts: the  
1375 role of a CYP3A4-like enzyme in the formation of 1'-OH and 4-OH midazolam.  
1376 *Xenobiotica* 46, 99–107. <https://doi.org/10.3109/00498254.2015.1051604>

- 1377 Omiecinski, C.J., Heuvel, J.P.V., Perdew, G.H., Peters, J.M., 2011. Xenobiotic  
1378 Metabolism, Disposition, and Regulation by Receptors: From Biochemical  
1379 Phenomenon to Predictors of Major Toxicities. *Toxicological Sciences* 120, S49–  
1380 S75. <https://doi.org/10.1093/toxsci/kfq338>
- 1381 Paterson, R.R.M., Simmonds, M.S.J., Blaney, W.M., 1987. Mycopesticidal effects of  
1382 characterized extracts of *Penicillium* isolates purified secondary metabolites  
1383 (including mycotoxins) on *Drosophila melanogaster* and *Spodoptera littoralis*.  
1384 *Journal of Invertebrate Pathology* 50, 124–133. [https://doi.org/10.1016/0022-  
1385 2011\(87\)90112-1](https://doi.org/10.1016/0022-2011(87)90112-1)
- 1386 Port, F., Bullock, S.L., 2016. Augmenting CRISPR applications in *Drosophila* with  
1387 tRNA-flanked sgRNAs. *Nature Methods* 13, 852–854.  
1388 <https://doi.org/10.1038/nmeth.3972>
- 1389 Puel, O., Galtier, P., Oswald, I.P., 2010. Biosynthesis and Toxicological Effects of  
1390 Patulin. *Toxins* 2, 613–631. <https://doi.org/10.3390/toxins2040613>
- 1391 Purcell, S., Neale, B., Todd-Brown, K., Thomas, L., Ferreira, M.A.R., Bender, D.,  
1392 Maller, J., Sklar, P., Bakker, P.I.W. de, Daly, M.J., Sham, P.C., 2007. PLINK: A  
1393 Tool Set for Whole-Genome Association and Population-Based Linkage  
1394 Analyses. *Am J Hum Genetics* 81, 559–575. <https://doi.org/10.1086/519795>
- 1395 Riba, J., Valle, M., Urbano, G., Yritia, M., Morte, A., Barbanoj, M.J., 2003. Human  
1396 Pharmacology of Ayahuasca: Subjective and Cardiovascular Effects, Monoamine  
1397 Metabolite Excretion, and Pharmacokinetics. *J Pharmacol Exp Ther* 306, 73–83.  
1398 <https://doi.org/10.1124/jpet.103.049882>
- 1399 Ritz, C., Baty, F., Streibig, J.C., Gerhard, D., 2015. Dose-Response Analysis Using  
1400 R. *PLoS ONE* 10, e0146021. <https://doi.org/10.1371/journal.pone.0146021>
- 1401 Robin, C., Kee, T.-J., 2021. Gene induction by natural toxins in *Drosophila*  
1402 *melanogaster*. *Dryad*. <https://doi.org/10.5061/dryad.stjqj2c40>
- 1403 Rohlf, M., Obmann, B., Petersen, R., 2005. Competition with filamentous fungi and  
1404 its implication for a gregarious lifestyle in insects living on ephemeral resources.

- 1405 Ecological Entomology 30, 556–563. <https://doi.org/10.1111/j.0307->  
1406 6946.2005.00722.x
- 1407 Salgado, V.L., David, M.D., 2017. Chance and design in proinsecticide discovery.  
1408 Pest Manag Sci 73, 723–730. <https://doi.org/10.1002/ps.4502>
- 1409 Scanlan, J.L., Gledhill-Smith, R.S., Battlay, P., Robin, C., 2020. Genomic and  
1410 transcriptomic analyses in *Drosophila* suggest that the ecdysteroid kinase-like  
1411 (EckL) gene family encodes the “detoxification-by-phosphorylation” enzymes of  
1412 insects. *Insect Biochemistry and Molecular Biology* 123, 103429.  
1413 <https://doi.org/10.1016/j.ibmb.2020.103429>
- 1414 Schmidt, J.M., Battlay, P., Gledhill-Smith, R.S., Good, R.T., Lumb, C., Fournier-  
1415 Level, A., Robin, C., 2017. Insights into DDT Resistance from the *Drosophila*  
1416 *melanogaster* Genetic Reference Panel. *Genetics* genetics.300310.2017.  
1417 <https://doi.org/10.1534/genetics.117.300310>
- 1418 Smith, A.F., Posakony, J.W., Rebeiz, M., 2017. Automated tools for comparative  
1419 sequence analysis of genic regions using the GenePalette application.  
1420 *Developmental biology* 429, 158–164. <https://doi.org/10.1016/j.ydbio.2017.06.033>
- 1421 Sonobe, H., Ohira, T., Ieki, K., Maeda, S., Ito, Y., Ajimura, M., Mita, K., Matsumoto,  
1422 H., Wilder, M.N., 2006. Purification, kinetic characterization, and molecular  
1423 cloning of a novel enzyme, ecdysteroid 22-kinase. *The Journal of biological*  
1424 *chemistry* 281, 29513–29524. <https://doi.org/10.1074/jbc.m604035200>
- 1425 Stevenson, P.C., 2020. For antagonists and mutualists: the paradox of insect toxic  
1426 secondary metabolites in nectar and pollen. *Phytochem Rev* 19, 603–614.  
1427 <https://doi.org/10.1007/s11101-019-09642-y>
- 1428 Team, R.C., 2019. R: A Language and Environment for Statistical Computing, R  
1429 Foundation for Statistical Computing. Vienna, Austria.
- 1430 Thorvaldsdóttir, H., Robinson, J.T., Mesirov, J.P., 2013. Integrative Genomics  
1431 Viewer (IGV): high-performance genomics data visualization and exploration.  
1432 *Brief Bioinform* 14, 178–192. <https://doi.org/10.1093/bib/bbs017>

- 1433 Trienens, M., Keller, N.P., Rohlf, M., 2010. Fruit, flies and filamentous fungi -  
1434 experimental analysis of animal-microbe competition using *Drosophila*  
1435 *melanogaster* and *Aspergillus* mould as a model system. *Oikos* 119, 1765–1775.  
1436 <https://doi.org/10.1111/j.1600-0706.2010.18088.x>
- 1437 Trienens, M., Kraaijeveld, K., Wertheim, B., 2017. Defensive repertoire of *Drosophila*  
1438 larvae in response to toxic fungi. *Molecular Ecology*.  
1439 <https://doi.org/10.1111/mec.14254>
- 1440 Tsabar, M., Eapen, V.V., Mason, J.M., Memisoglu, G., Waterman, D.P., Long, M.J.,  
1441 Bishop, D.K., Haber, J.E., 2015. Caffeine impairs resection during DNA break  
1442 repair by reducing the levels of nucleases Sae2 and Dna2. *Nucleic Acids*  
1443 *Research* 43, 6889–6901. <https://doi.org/10.1093/nar/gkv520>
- 1444 Uefuji, H., Tatsumi, Y., Morimoto, M., Kaothien-Nakayama, P., Ogita, S., Sano, H.,  
1445 2005. Caffeine Production in Tobacco Plants by Simultaneous Expression of  
1446 Three Coffee N-methyltransferases and Its Potential as a Pest Repellent. *Plant Mol*  
1447 *Biol* 59, 221–227. <https://doi.org/10.1007/s11103-005-8520-x>
- 1448 Wang, S., Yang, C., Tu, H., Zhou, J., Liu, X., Cheng, Y., Luo, J., Deng, X., Zhang,  
1449 H., Xu, J., 2017. Characterization and Metabolic Diversity of Flavonoids in Citrus  
1450 Species. *Scientific Reports* 7, 10549. <https://doi.org/10.1038/s41598-017-10970-2>
- 1451 Wickham, H., 2016. *ggplot2, Elegant Graphics for Data Analysis*.  
1452 <https://doi.org/10.1007/978-3-319-24277-4>
- 1453 Wickham, H., Averick, M., Bryan, J., Chang, W., McGowan, L., François, R.,  
1454 Golemund, G., Hayes, A., Henry, L., Hester, J., Kuhn, M., Pedersen, T., Miller,  
1455 E., Bache, S., Müller, K., Ooms, J., Robinson, D., Seidel, D., Spinu, V.,  
1456 Takahashi, K., Vaughan, D., Wilke, C., Woo, K., Yutani, H., 2019. Welcome to the  
1457 Tidyverse. *J Open Source Softw* 4, 1686. <https://doi.org/10.21105/joss.01686>
- 1458 Williams, R.T., 1959. *Detoxication mechanisms: the metabolism and detoxication*  
1459 *of drugs, toxic substances and other organic compounds*, 2nd ed. rev. and enl.  
1460 ed, Chapman & Hall. Chapman & Hall.



- 1461 Williams, R.T., 1951. The metabolism of drugs and toxic substances. Annual Review  
1462 of Biochemistry 20, 441–464.  
1463 <https://doi.org/10.1146/annurev.bi.20.070151.002301>
- 1464 Willoughby, L., Chung, H., Lumb, C., Robin, C., Batterham, P., Daborn, P.J., 2006. A  
1465 comparison of *Drosophila melanogaster* detoxification gene induction responses  
1466 for six insecticides, caffeine and phenobarbital. Insect Biochemistry and Molecular  
1467 Biology 36, 934–942. <https://doi.org/10.1016/j.ibmb.2006.09.004>
- 1468 Wu, C., Chakrabarty, S., Jin, M., Liu, K., Xiao, Y., 2019. Insect ATP-Binding  
1469 Cassette (ABC) Transporters: Roles in Xenobiotic Detoxification and Bt  
1470 Insecticidal Activity. International Journal of Molecular Sciences 20, 2829.  
1471 <https://doi.org/10.3390/ijms20112829>
- 1472 Yang, J., McCart, C., Woods, D.J., Terhzaz, S., Greenwood, K.G., French-Constant,  
1473 R.H., Dow, J.A.T., 2007. A *Drosophila* systems approach to xenobiotic  
1474 metabolism. Physiological Genomics 30, 223–231.  
1475 <https://doi.org/10.1152/physiolgenomics.00018.2007>
- 1476 Zeileis, A., 2006. Object-Oriented Computation of Sandwich Estimators. J Stat Softw  
1477 16. <https://doi.org/10.18637/jss.v016.i09>
- 1478 Zeileis, A., 2004. Econometric Computing with HC and HAC Covariance Matrix  
1479 Estimators. J Stat Softw 11. <https://doi.org/10.18637/jss.v011.i10>
- 1480 Zelensky, A.N., Sanchez, H., Ristic, D., Vidic, I., Rossum-Fikkert, S.E. van, Essers,  
1481 J., Wyman, C., Kanaar, R., 2013. Caffeine suppresses homologous  
1482 recombination through interference with RAD51-mediated joint molecule  
1483 formation. Nucleic Acids Research 41, 6475–6489.  
1484 <https://doi.org/10.1093/nar/gkt375>
- 1485 Zhu, F., Parthasarathy, R., Bai, H., Woithe, K., Kausmann, M., Nauen, R., Harrison,  
1486 D.A., Palli, S.R., 2010. A brain-specific cytochrome P450 responsible for the  
1487 majority of deltamethrin resistance in the QTC279 strain of *Tribolium castaneum*.  
1488 PNAS 107, 8557–8562. <https://doi.org/10.1073/pnas.1000059107>

1489

1490

1491 **Supplementary Materials**

1492

1493 **Supplementary Figures**

1494

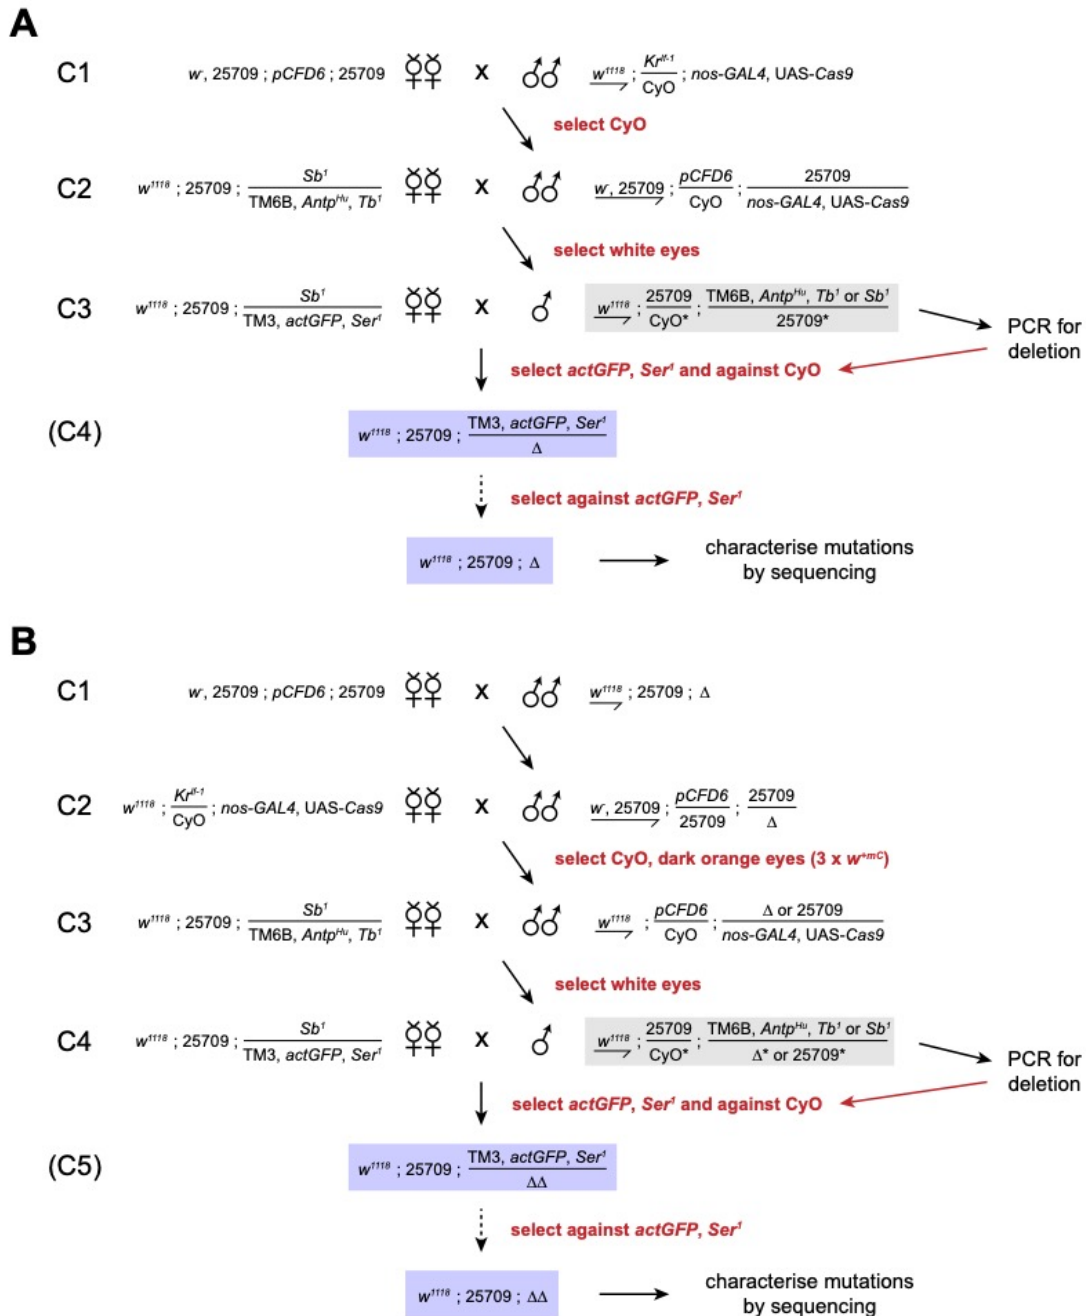

1495

1496 **Figure S1.** Crossing schemes for CRISPR-Cas9 mutagenesis on chromosome 3 (chr3) using *pCFD6*-

1497 transformed flies. (A) Initial mutagenesis of a wild-type chr3 locus in the BL25709 genetic background

1498 to produce a deletion allele ( $\Delta$ ). The single males used in C3 (grey box) are ‘founder males’ of each

1499 potential mutant line. (B) Mutagenesis of an already-mutagenised chr3 ( $\Delta$ ) to produce a double  
1500 mutant line ( $\Delta\Delta$ ). In this scheme, founder males (grey box) are the single males used in C4. Males  
1501 used in C3 are selected by the colour of their eyes—as the *pCFD6*, *nos-GAL4* and *UAS-Cas9*  
1502 constructs all contain a mini-white gene ( $w^{+mC}$ ) that produces orange eyes in a  $w^-$  background,  
1503 individuals that inherit all three transgenic constructs (i.e. mutagenic males) can be distinguished from  
1504 those that only inherit only two (*nos-GAL4* and *UAS-Cas9*). The PCR step after C4 (scheme B) needs  
1505 to check for the presence of both the initial mutation as well as any new mutations produced. Dashed  
1506 arrows indicate a possible homozygosing step (if the alleles generated are homozygous-viable). C3 in  
1507 (A) and C4 in (B) can use either TM3, *actGFP*, *Ser<sup>1</sup>* or *Sb<sup>1</sup>* males as founders, in order to double the  
1508 number of potential mutant lines that can be generated from the cross.  
1509

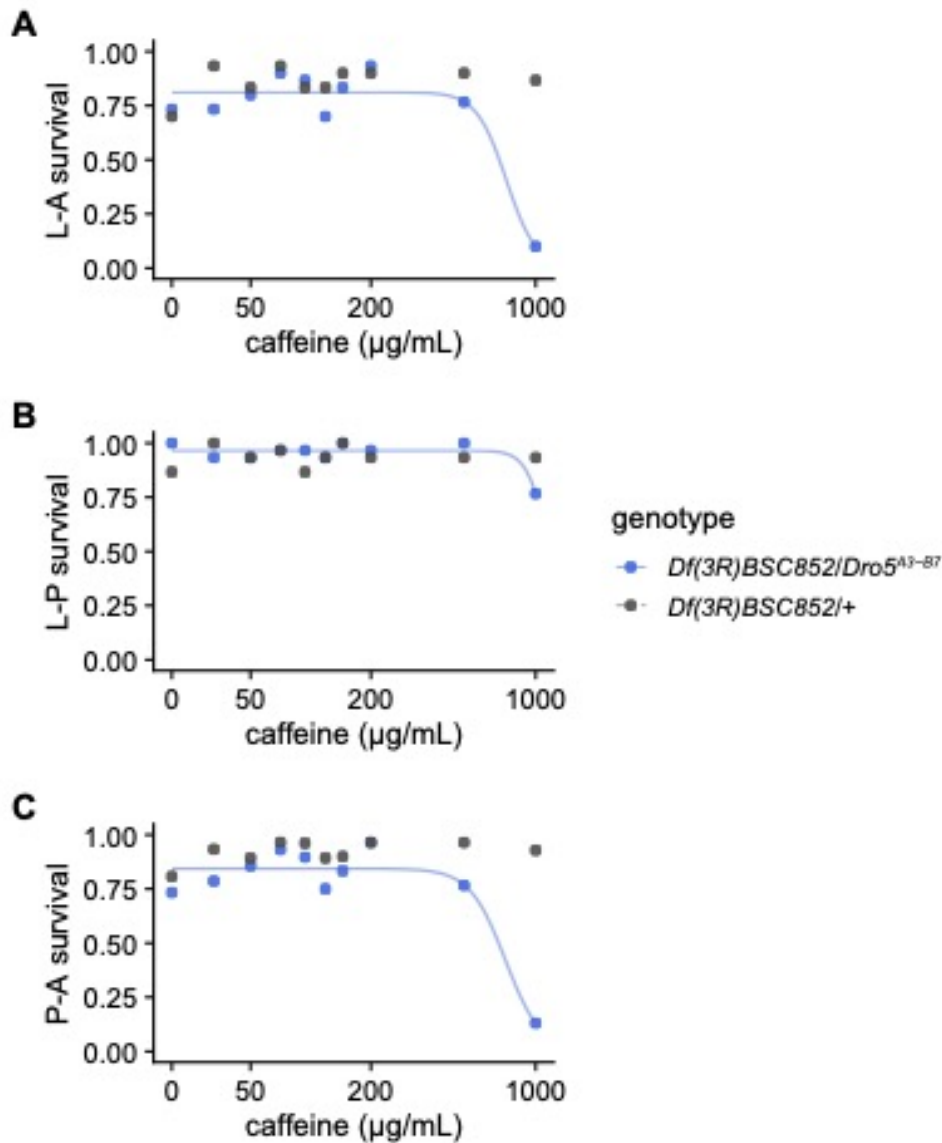

1510

1511 **Figure S2.** Developmental survival of *Df(3R)BSC852/Dro5<sup>A3-B7</sup>* animals (blue) and *Df(3R)BSC852/+*

1512 animals (grey) on media containing 0–1,000 µg/mL caffeine. Curves are fitted log-logistic regression

1513 dose-response models for each genotype, excluding survival on the control media (0 µg/mL, open

1514 circles). Where data did not significantly contain a dose-response effect, no curve has been fitted. (A)

1515 Larval-adult (L-A) survival. (B) Larval-pupal (L-P) survival. (C) Pupal-adult (P-A) survival.

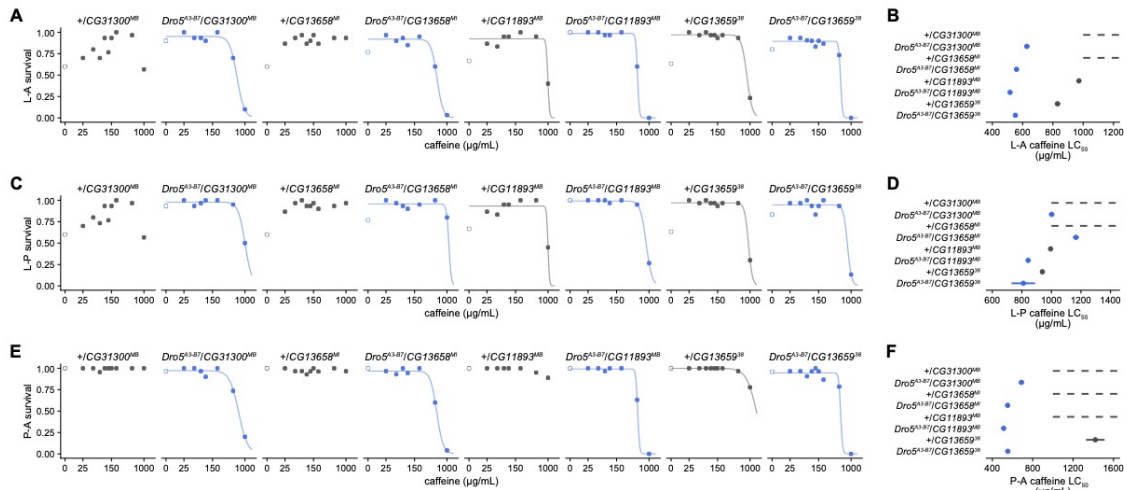

1516

1517

**Figure S3.** Developmental survival of heterozygotes of single-gene disruption alleles and the wild-type allele (+, grey) and heterozygotes of single-gene disruption alleles and the *Dro5*<sup>A3-B7</sup> allele (blue)

1518

on media containing 0–1,000 µg/mL caffeine. L-A, larval-adult; L-P, larval-pupal; P-A, pupal-adult.

1519

(A,C,E) Proportional survival for each of the three developmental survival types. Curves are fitted log-logistic regression dose-response models for each genotype, excluding survival on the control media

1520

(0 µg/mL, open circles). Where data did not significantly contain a dose-response effect, no curve has

1521

been fitted. (B,D,F) LC<sub>50</sub> values and 95% CIs on caffeine media for each of the three survival types,

1522

for each genotype. Genotypes without fitted models (due to a lack of dose-response effect) have a

1523

dashed line to indicate a likely LC<sub>50</sub> value above 1,000 µg/mL.

1524

1525

1526

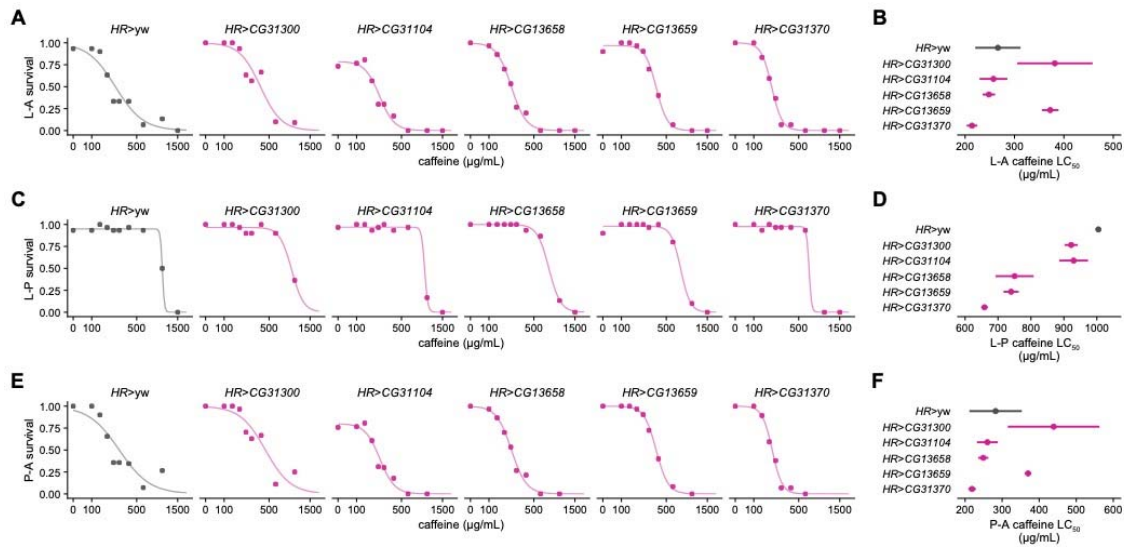

1527

1528

1529

1530

1531

1532

1533

1534

**Figure S4.** Developmental survival of offspring from crossing *HR-GAL4* homozygotes and either UAS-ORF responder homozygotes for five *Dro5* genes (purple) or homozygotes of the wild-type genetic background (*yw*, grey) on media containing 0–1,500 µg/mL caffeine. The *HR>CG31300* genotype was not assayed on 1,500 µg/mL media. L-A, larval-adult; L-P, larval-pupal; P-A, pupal-adult. (A,C,E) Proportional survival for each of the three developmental survival types. Curves are fitted log-logistic regression dose-response models for each genotype. (B,D,F) LC<sub>50</sub> values and 95% CIs on caffeine media for each of the three survival types, for each genotype.

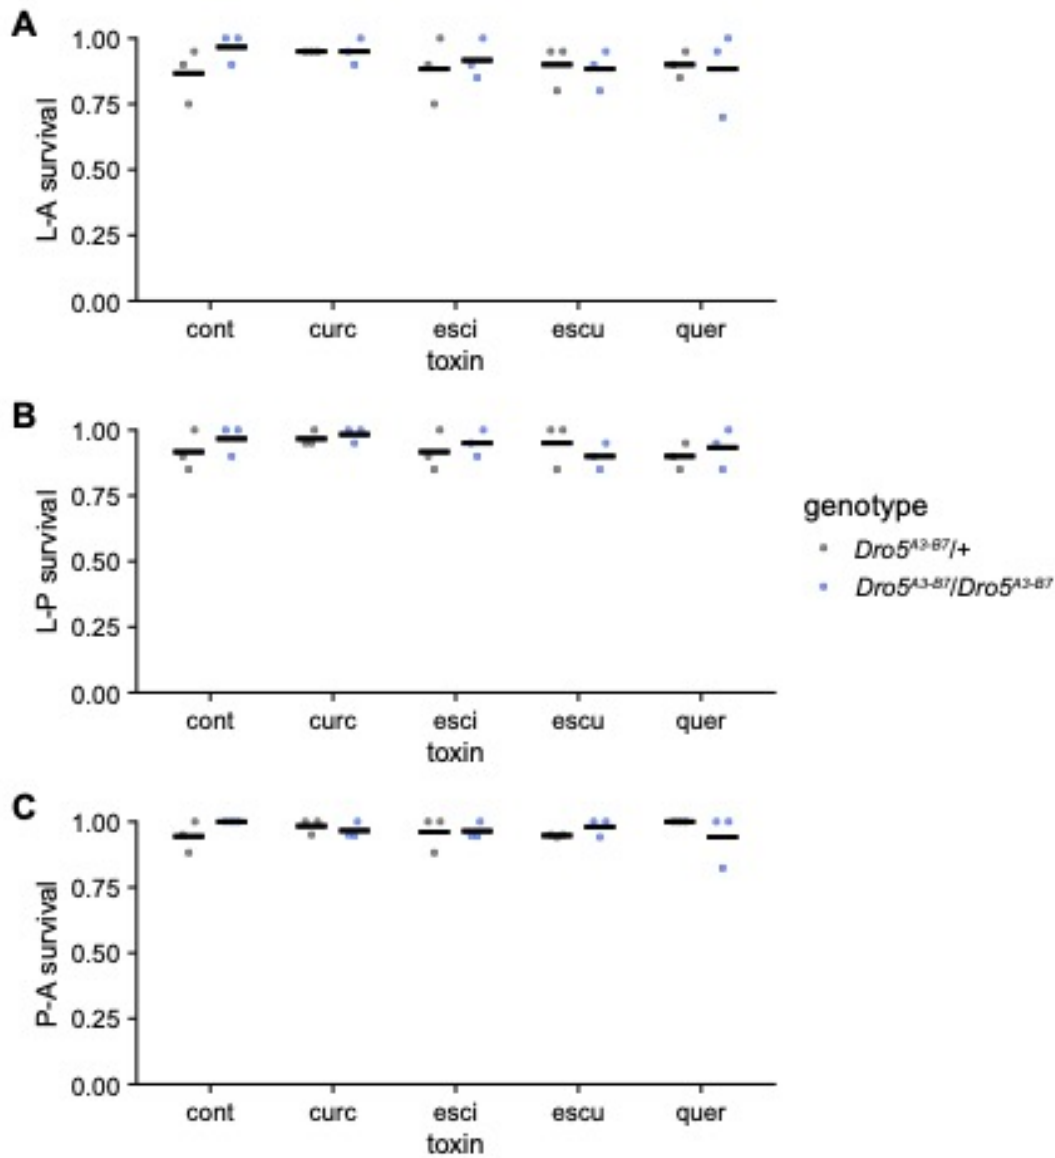

1535

1536 **Figure S5.** Developmental survival of *Dro5<sup>A3-B7</sup>/*Dro5<sup>A3-B7</sup>** animals (blue) and *Dro5<sup>A3-B7</sup>/+* animals  
1537 (grey) on media containing curcumin (curc; 200 µg/mL), escin (esci; 200 µg/mL), esculin (escu; 200  
1538 µg/mL) or quercetin (40 µg/ml), or control media (cont; EtOH only). Each dot is a vial of 20 larvae;  
1539 black bars indicate the mean. (A) Larval-adult (L-A) survival. (B) Larval-pupal (L-P) survival. (C)  
1540 Pupal-adult (P-A) survival.

1541



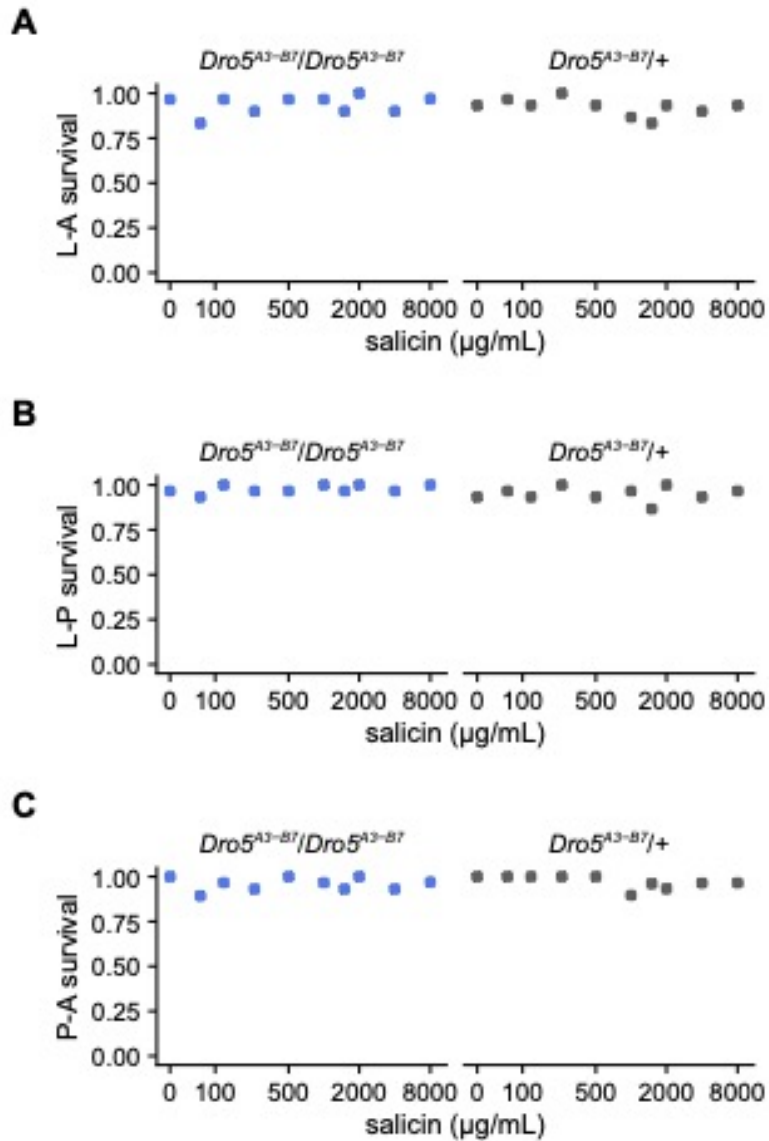

1542

1543 **Figure S6.** Developmental survival of *Dro5<sup>A3-B7</sup>/Dro5<sup>A3-B7</sup>* animals (blue) and *Dro5<sup>A3-B7</sup>/+* animals  
1544 (grey) on media containing 0–8,000 µg/mL salicin. No dose-response models have been fitted due to  
1545 a lack of significant dose-response effects. (A) Larval-adult (L-A) survival. (B) Larval-pupal (L-P)  
1546 survival. (C) Pupal-adult (P-A) survival.

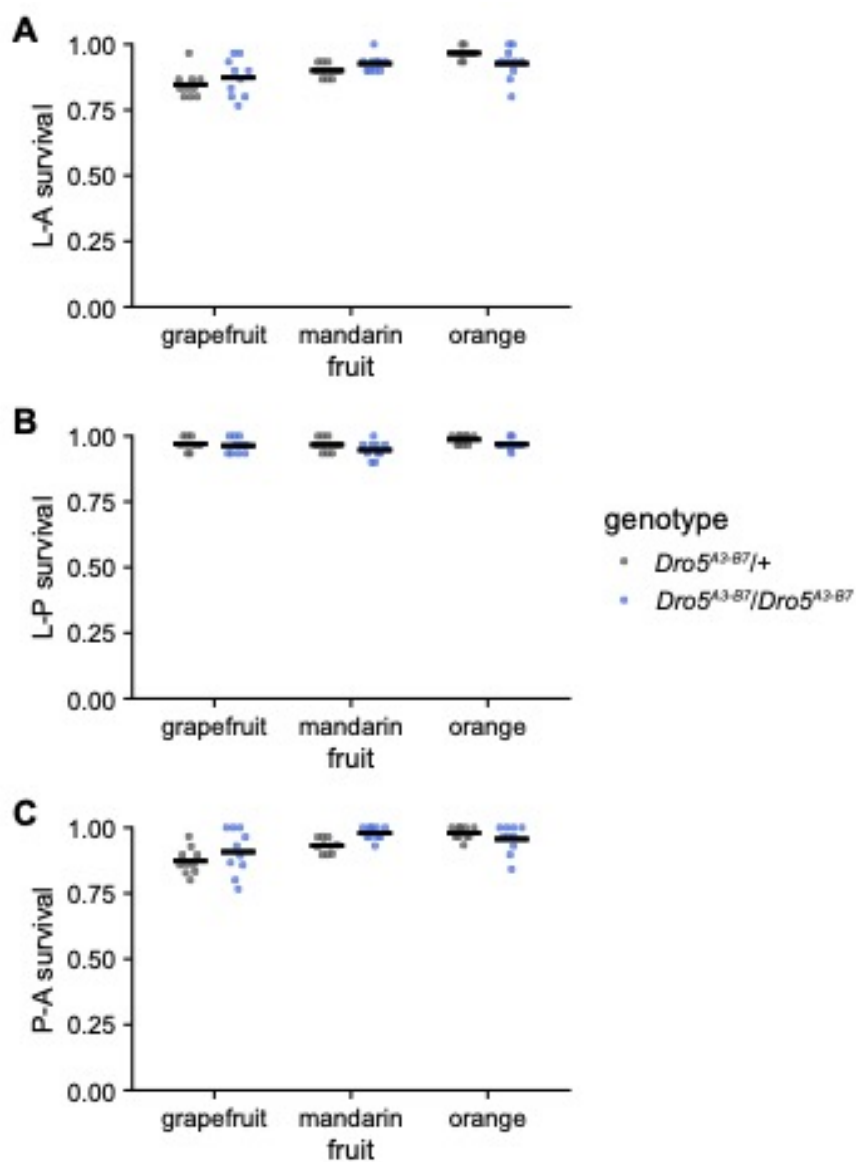

1547

1548 **Figure S7.** Developmental survival of *Dro5<sup>A3-B7/Dro5<sup>A3-B7</sup></sup>* animals (blue) and *Dro5<sup>A3-B7/+</sup>* animals

1549 (grey) on media containing grapefruit, mandarin or orange juice. Each dot is a vial of 30 larvae; black

1550 bars indicate the mean. (A) Larval-adult (L-A) survival. (B) Larval-pupal (L-P) survival. (C) Pupal-adult

1551 (P-A) survival.

1552

1553

1554 **Supplementary Tables**

1555

1556 **Table S1.** List of primer sequences used for cloning and genotyping.

1557

| Primer ID     | Sequence (5' to 3')                                                          |
|---------------|------------------------------------------------------------------------------|
| pUASTattB_3F  | CGCAGCTGAACAAGCTAAAC                                                         |
| pUASTattB_5R  | TGTCACACCACAGAAGTAAGG                                                        |
| CG31300_EagIF | TAAGCACGGCCGATGACTGACAAGTTAGATGC                                             |
| CG31300_KpnIR | TAAGCAGGTACCGCTATAGACATTTAAAGTAGCC                                           |
| CG31104_EagIF | TAAGCACGGCCGAAAATGGAAGGCAAAAATATTG                                           |
| CG31104_KpnIR | TAAGCAGGTACCCATTATAGATCCTTAAAGTATCC                                          |
| CG13658_EagIF | TAAGCACGGCCGATGGCGGAAAACGTAGATTC                                             |
| CG13658_KpnIR | TAAGCAGGTACCTTAAAGATCTTTAAAATATCCCAG                                         |
| CG11893_EagIF | TAAGCACGGCCGATGCCAGAAAACGCAGATAC                                             |
| CG11893_KpnIR | TAAGCAGGTACCATCAAAGATCGTTAAAGTATCCC                                          |
| CG13659_EagIF | TAAGCACGGCCGATGGCCGAGGAAAGTTTC                                               |
| CG13659_KpnIR | TAAGCAGGTACCTTAAAAGTCGTCAAATATCCCG                                           |
| CG31370_EagIF | TAAGCACGGCCGATGGCTGAAGATAGCTTAGC                                             |
| CG31370_KpnIR | TAAGCAGGTACCTTATAAGTTCTCAAATATCCAG                                           |
| CG31436_EagIF | TAAGCACGGCCGATGTCCGGGAACCCCCAAAAC                                            |
| CG31436_KpnIR | TAAGCAGGTACCATGTTTAGGCATGGAGTAATCCC                                          |
| pCFD6_D5ΔA_1F | CGGCCCGGGTTTCGATTCCCGGCCGATGCATCAGTTGTAACCTCTA<br>AGGTGTTTCAGAGCTATGCTGGAAAC |

|               |                                                                             |
|---------------|-----------------------------------------------------------------------------|
| pCFD6_D5ΔA_1R | TCGCGGTGGTACACTCTGCATGCACCAGCCGGAATCGAACC                                   |
| pCFD6_D5ΔA_2F | TGCAGAGTG TACCACCGGAGTTTCAGAGCTATGCTGGAAAC                                  |
| pCFD6_D5ΔA_2R | ACATAATAGAAGGCATTTCTGCACCAGCCGGAATCGAACC                                    |
| pCFD6_D5ΔA_3F | GGAAATGCCTTCTATTATGTGTTTCAGAGCTATGCTGGAAAC                                  |
| pCFD6_D5ΔA_3R | ATTTAACTTGCTATTTCTAGCTCTAAAACCTATGACCCTTATGTTCA<br>AGTGCACCAGCCGGAATCGAACC  |
| pCFD6_D5ΔB_1F | CGGCCCGGGTTCGATTCCCGGCCGATGCAAATCGGTTGAACACGT<br>ATATGTTTCAGAGCTATGCTGGAAAC |
| pCFD6_D5ΔB_1R | CCCTAGCGCGAAACATAATGTGCACCAGCCGGAATCGAACC                                   |
| pCFD6_D5ΔB_2F | CATTATGTTTCGCGCTAGGGGTTTCAGAGCTATGCTGGAAAC                                  |
| pCFD6_D5ΔB_2R | TGTCATCGCCGACCTGTGCATGCACCAGCCGGAATCGAACC                                   |
| pCFD6_D5ΔB_3F | TCGACAGGTCGGCGATGACAGTTTCAGAGCTATGCTGGAAAC                                  |
| pCFD6_D5ΔB_3R | ATTTAACTTGCTATTTCTAGCTCTAAAACGTC CATGGGTGTACGAC<br>TCTTGCACCAGCCGGAATCGAACC |
| pCFD6_seqfwd  | GTAGACATCAAGCATCGGTGG                                                       |
| pCFD6_seqrev  | TTAGAGCTTTAAATCTCTGTAGGTAG                                                  |
| D5ΔA_1F       | GATGGGTCATTCTGACACCGA                                                       |
| D5ΔA_1R       | TTCTTCCTGAGCAACCGGAC                                                        |
| D5ΔA_2F       | GAGCCTCGGCAGGTGTTAAT                                                        |
| D5ΔA_2R       | TGCGATCAATTAGCCATGCAA                                                       |
| D5ΔB_1F       | CTGATCCGTTTGCAGACACT                                                        |
| D5ΔB_1R       | CTTGGAGTAGGCACTGCTGAT                                                       |
| D5ΔB_2F       | ACCAACCGAAAAGGCGAGTT                                                        |

D5ΔB\_2R TCCGGCTCCAAAAGCATGTAA

CG31370del\_1F GCTGAATGTCCCAGAATGGT

CG31370del\_1R TCCTTAACGAATTCTGGTCGCT

---

1558

1559

1560 **Table S2.** DGRP genotypes for *CG31370* and caffeine tolerance phenotypes.

1561 [See file “Table S2.xlsx”]

1562
